# Supplementary material for: Electrophilic iodination: a gateway to high iodine compounds and energetic materials
Source: Royal Society of Chemistry journal article supplement (doi:10.1039/c6dt02438f), 2016-01-01

## Supporting Information

### Electrophilic Iodination: A Gateway to High Iodine Compounds and Energetic Materials

Deepak Chand, Chunlin He, Lauren A. Mitchell, Damon A. Parrish and Jean'ne M Shreeve\*

#### Table of Contents:

|                                                                                      | Page   |
|--------------------------------------------------------------------------------------|--------|
| Isodesmic reactions and Gaussian and Gamess calculations                             | S2 S3  |
| Table of crystallographic data for <b>5</b> , <b>10</b> and <b>14</b> .              | S4     |
| <sup>1</sup> H NMR, <sup>13</sup> C NMR, IR and DSC spectra of compounds <b>1-14</b> | S5 S31 |

## Calculations – University of Idaho

### Gaussian Calculations

Geometric optimization and frequency analyses of the compounds in the isodesmic reactions were accomplished by using the B3LYP functional with the 6-31+G\*\* basis set from Gaussian 03.<sup>[1]</sup> All of the optimized structures were characterized to be true local energy minima on the potential energy surface without imaginary frequencies. The enthalpy of reaction is obtained by combining the MP2/6-311++G\*\* energy difference for the reactions, the scaled zero point energies (ZPE), values of thermal correction ( $H_T$ ), and other thermal factors. The gas phase heat of formation at 298.15K for compound **11** was calculated from the atomization energy at the G2 level, gas phase enthalpies of **12** and **14** were calculated based on isodesmic reactions in Scheme S1 at MP2/6-311++G(d,p)/B3LYP(6-31+G(d,p)) level. The gas phase enthalpies of formation of **11**, **12** and **14** were converted to the solid state enthalpies of formation by subtraction of sublimation enthalpy calculated according to Trouton's rule ( $\Delta H_{\text{sub}} = 188T_m$ ) (Table S1).<sup>[2]</sup>

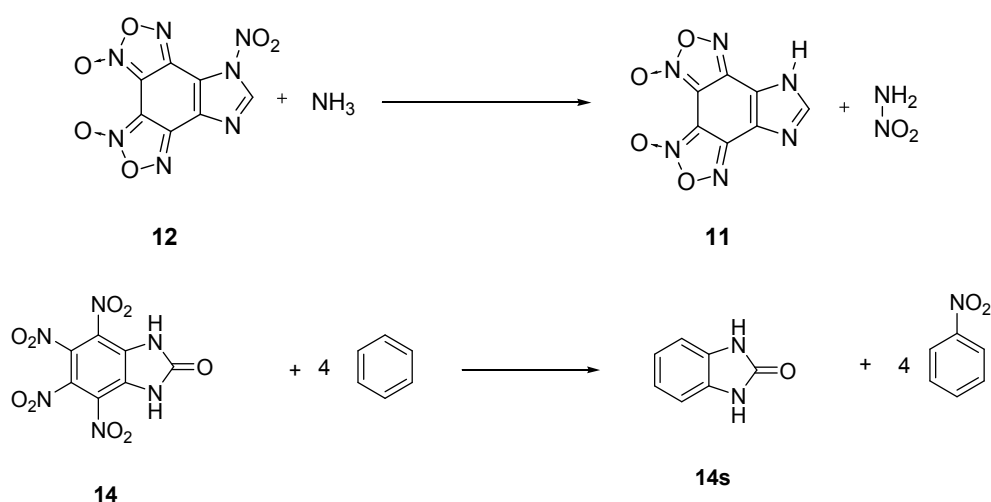

Scheme S1: Isodesmic reactions for compounds **12** and **14**.

Table S1. Calculated (MP2/6-311++G\*\*//B3LYP/6-31+G\*\*) total energy ( $E_0$ ), corrected MP2 total energy ( $E_{\text{corr}}$ ), zero-point energy (ZPE), thermal correction to enthalpy ( $H_T$ ), heat of reaction for the isodesmic reaction ( $\Delta H_R$ ) and gas phase heats of formation ( $\Delta_f H_m^\circ$ ) from Gaussian 03.<sup>[1]</sup>

|              | ZPE<br>[Hartree/Particle] | $H_T$<br>[Hartree/Particle] | $E_0$<br>[Hartree/Particle] | $\Delta H_R$<br>(Hartree/Particle) | $\Delta H_{\text{sub}}^a$ (kJ<br>mol <sup>-1</sup> ) | $\Delta_f H_m^\circ$ (g)<br>[kJ mol <sup>-1</sup> ] | $\Delta_f H_m^\circ$ (s)<br>[kJ mol <sup>-1</sup> ] |
|--------------|---------------------------|-----------------------------|-----------------------------|------------------------------------|------------------------------------------------------|-----------------------------------------------------|-----------------------------------------------------|
| Benzene      | 0.100441                  | 0.105785                    | -231.5842377                | -                                  | -                                                    | +82.9 <sup>b</sup>                                  | -                                                   |
| Nitrobenzene | 0.103043                  | 0.110809                    | -435.6906555                | -                                  | -                                                    | +68.5 <sup>b</sup>                                  | -                                                   |
| <b>11</b>    | 0.109795                  | 0.1223                      | -895.031117                 | -                                  | 88.7                                                 | +604.2 <sup>c</sup>                                 | +515.5                                              |
| <b>12</b>    | 0.110929                  | 0.126049                    | -1099.084817                | 0.05495                            | 79.1                                                 | +604.3                                              | +525.2                                              |
| <b>14s</b>   | 0.122904                  | 0.131114                    | -453.9743248                | -                                  | -                                                    | -63.9 <sup>d</sup>                                  | -                                                   |
| <b>14</b>    | 0.131244                  | 0.149867                    | -1270.361893                | -0.03684                           | 107.5                                                | -24.8                                               | -132.3                                              |

<sup>a</sup> Heat of sublimation calculated according to Trouton's rule ( $\Delta H_{\text{sub}} = 0.188T_d$ ) ref: [2]. <sup>b</sup> Gas phase heat of formation NIST ref [3]; <sup>c</sup> Calculated from G2. <sup>d</sup> Experimental gas phase heat of formation ref [4]

### GAMESS Calculations

The calculations for compound **14** were also performed by using GAMESS quantum chemistry program<sup>[5,6]</sup> with a different isodesmic reaction shown in Scheme S2. The heat of reaction is obtained by combining corrected

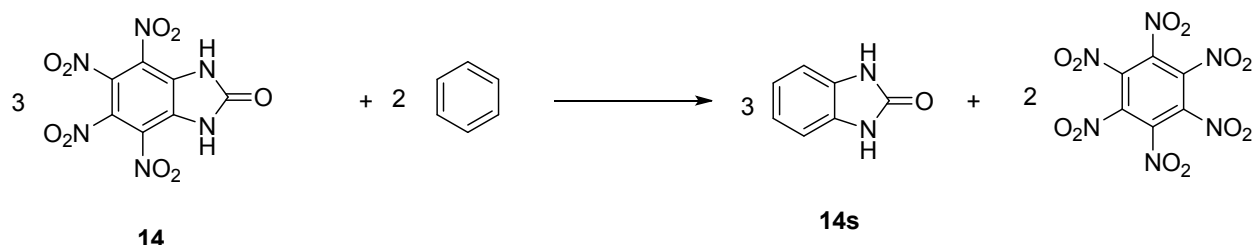

Scheme S2: Isodesmic reaction for **14**

B3LYP/6-311++(d,p) energy difference of the products and reactants calculated at B3LYP /6-311++g(d,p)//B3LYP6-311++g(d,p)) level. The gas phase heats of formation for the related species were calculated from the atomization energy at the G3(MP2) level. The heat of sublimation was obtained using an approach developed by Rice and Byrd (Table S2).<sup>[7,8]</sup>

Table S2: Calculation of heat of formation of **14**

|                         | B3LYP/6-311++(d,p) | B3LYP ZPE | B3LYP scaled ZPE | b3lyp elect+scaled ZPE | b3lyp thermal correction | $\Delta H_R$ (Hartree/Particle) | $\Delta H_f$ kcal/mol | $\Delta H_f$ kJ/mol | $\Delta H_{sub}$ (kJ mol <sup>-1</sup> ) | $\Delta_f H_m^\circ(s)$ [kJ mol <sup>-1</sup> ] |
|-------------------------|--------------------|-----------|------------------|------------------------|--------------------------|---------------------------------|-----------------------|---------------------|------------------------------------------|-------------------------------------------------|
| <b>14</b>               | -1272.842640       | 0.130986  | 0.128759         | -1272.713881           | 0.018791                 | 0.07378                         | 1.5                   | 6.3                 | 120.9                                    | -114.6                                          |
| <b>14s</b>              | -454.987584        | 0.122195  | 0.120118         | -454.867467            | 0.008385                 |                                 |                       | -62.9 <sup>a</sup>  |                                          |                                                 |
| <b>Hexanitrobenzene</b> | -1458.901699       | 0.111421  | 0.109527         | -1458.792172           | 0.021663                 |                                 |                       | 279.1 <sup>a</sup>  |                                          |                                                 |
| <b>Benzene</b>          | -232.157071        | 0.099939  | 0.098240         | -232.058831            | 0.005412                 |                                 |                       | 78.2 <sup>a</sup>   |                                          |                                                 |

<sup>a</sup> Calculated based on G3(MP2) using GAMESS.

- [1] Gaussian03, RevisionD.01, M. J. Frisch, G.W. Trucks, H.B. Schlegel, G.E. Scuseria, M.A. Robb, J.R. Cheeseman, J.A. Montgomery, Jr., T. Vreven, K.N. Kudin, J.C. Burant, J.M. Millam, S.S. Iyengar, J. Tomasi, V. Barone, B. Mennucci, M. Cossi, G. Scalmani, N. Rega, G.A. Petersson, H. Nakatsuji, M. Hada, M. Ehara, K. Toyota, R. Fukuda, J. Hasegawa, M. Ishida, T. Nakajima, Y. Honda, O. Kitao, H. Nakai, M. Klene, X. Li, J.E. Knox, H.P. Hratchian, J.B. Cross, V. Bakken, C. Adamo, J. Jaramillo, R. Gomperts, R.E. Stratmann, O. Yazyev, A.J. Austin, R. Cammi, C. Pomelli, J.W. Ochterski, P.Y. Ayala, K. Morokuma, G.A. Voth, P. Salvador, J.J. Dannenberg, V.G. Zakrzewski, S. Dapprich, A.D. Daniels, M.C. Strain, O. Farkas, D.K. Malick, A.D. Rabuck, K. Raghavachari, J.B. Foresman, J.V. Ortiz, Q. Cui, A.G. Baboul, S. Clifford, J. Cioslowski, B.B. Stefanov, G. Liu, A. Liashenko, P. Piskorz, I. Komaromi, R.L. Martin, D.J. Fox, T. Keith, M.A. Al-Laham, C.Y. Peng, A. Nanayakkara, M. Challacombe, P.M.W. Gill, B. Johnson, W. Chen, M.W. Wong, C. Gonzalez, J.A. Pople, Gaussian, Inc., Wallingford CT, 2004.
- [2] M. S. Westwell, M. S. Searle, D. J. Wales and D. H. Williams, *J. Am. Chem. Soc.*, 1995, **117**, 5013–5015.
- [3] <http://webbook.nist.gov/chemistry/>
- [4] V. M. F. Morais, M. S. Miranda, M. A. R. Matos, J. F. Liebman, *Mol. Phys.* 2006, **104**, 325–334.
- [5] M. W. Schmidt, K. K. Baldridge, J. A. Boatz, S. T. Elbert, M. S. Gordon, J. H. Jensen, S. Koseki, N. Matsunaga, K. A. Nguyen, S. Su, T. L. Windus, M. Dupuis, J.A. Montgomery. *J. Comput. Chem.* 1993, **14**, 1347–1363
- [6] M. S. Gordon, M. W. Schmidt. *Advances in Electronic Structure Theory, in Theory and Applications of Computational Chemistry: The First Forty Years*; Dykstra, C.; Frenking, G.; Kim, K.; Scuseria, G., Eds.; Elsevier: Amsterdam, 2005; pp 1167–1190.
- [7] E.F.C. Byrd, B. M. Rice. *J. Phys. Chem. A* 2006, **110** (3), 1005–1013; *ibid* 2009, **113**, 5813.
- [8] E.F.C. Byrd, B. M. Rice. *J. Phys. Chem. A* 2009, **113** (1), 345–352.

Table S3. Crystallographic data for **5**, **10** and **14**

| Compound                                                         | <b>5</b>                                                                   | <b>10</b> •C <sub>2</sub> H <sub>6</sub> O <sub>5</sub> S                    | <b>14</b> •C <sub>4</sub> H <sub>8</sub> O <sub>2</sub>         |
|------------------------------------------------------------------|----------------------------------------------------------------------------|------------------------------------------------------------------------------|-----------------------------------------------------------------|
| Formula                                                          | C <sub>8</sub> H <sub>5</sub> I <sub>2</sub> N <sub>7</sub> O <sub>4</sub> | C <sub>9</sub> H <sub>8</sub> I <sub>2</sub> N <sub>4</sub> O <sub>5</sub> S | C <sub>11</sub> H <sub>10</sub> N <sub>6</sub> O <sub>11</sub>  |
| CCDC number                                                      | 1424001                                                                    | 1424002                                                                      | 1424003                                                         |
| <i>M<sub>w</sub></i>                                             | 516.99                                                                     | 538.05                                                                       | 402.25                                                          |
| Crystal size [mm <sup>3</sup> ]                                  | 0.209 x 0.034 x 0.005                                                      | 0.123 x 0.057 x 0.032                                                        | 0.310 x 0.175 x 0.058                                           |
| Crystal system                                                   | Monoclinic                                                                 | Monoclinic                                                                   | Triclinic                                                       |
| Space group                                                      | P2 <sub>1</sub> /c                                                         | P2 <sub>1</sub> /c                                                           | P-1                                                             |
| <i>a</i> [Å]                                                     | 16.6797(6)                                                                 | 5.34160(10)                                                                  | 7.8304(7)                                                       |
| <i>b</i> [Å]                                                     | 98.956(2)                                                                  | 25.7684(6)                                                                   | 9.3182(8)                                                       |
| <i>c</i> [Å]                                                     | 9.1213(3)                                                                  | 11.3694(3)                                                                   | 12.2176(11)                                                     |
| α [°]                                                            | 90                                                                         | 90                                                                           | 102.459(3)                                                      |
| β [°]                                                            | 107.606(19)                                                                | 97.2720(10)                                                                  | 104.030(3)                                                      |
| γ [°]                                                            | 90                                                                         | 90                                                                           | 100.776(3)                                                      |
| <i>V</i> [Å <sup>3</sup> ]                                       | 1339.59(8)                                                                 | 1552.35(6)                                                                   | 817.12(13)                                                      |
| <i>Z</i>                                                         | 4                                                                          | 4                                                                            | 2                                                               |
| <i>T</i> [K]                                                     | 150(2)                                                                     | 273(2)                                                                       | 296(2)                                                          |
| ρ <sub>calcd</sub> [Mg m <sup>-3</sup> ]                         | 2.498                                                                      | 2.302                                                                        | 1.635                                                           |
| μ [mm <sup>-1</sup> ]                                            | 37.190                                                                     | 4.211                                                                        | 0.149                                                           |
| <i>F</i> (000)                                                   | 960                                                                        | 1008                                                                         | 412                                                             |
| θ [°]                                                            | 2.682 to 68.705                                                            | 3.613 to 26.381                                                              | 2.506 to 26.422                                                 |
| Index ranges                                                     | -17<= <i>h</i> <=20<br>-10<= <i>k</i> <=10<br>-10<= <i>l</i> <=10          | -6<= <i>h</i> <=6<br>-32<= <i>k</i> <=32<br>-14<= <i>l</i> <=14              | -8<= <i>h</i> <=9<br>-11<= <i>k</i> <=11<br>-15<= <i>l</i> <=15 |
| Reflections collected                                            | 7543                                                                       | 14724                                                                        | 7885                                                            |
| Independent reflections ( <i>R</i> <sub>int</sub> )              | 2389 [ <i>R</i> <sub>int</sub> ] = 0.0453]                                 | 3168 [ <i>R</i> <sub>int</sub> ] = 0.0346]                                   | 3321 [ <i>R</i> <sub>int</sub> ] = 0.0157]                      |
| Data/restraints/parameters                                       | 2389 / 1 / 193                                                             | 3168 / 0 / 196                                                               | 3321 / 0 / 275                                                  |
| GOF on <i>F</i> <sup>2</sup>                                     | 1.024                                                                      | 0.827                                                                        | 1.069                                                           |
| <i>R</i> <sub>1</sub> ( <i>I</i> > 2σ( <i>I</i> )) <sup>a</sup>  | 0.0322                                                                     | 0.0275                                                                       | 0.0381                                                          |
| <i>wR</i> <sub>2</sub> ( <i>I</i> > 2σ( <i>I</i> )) <sup>b</sup> | 0.0718                                                                     | 0.0758                                                                       | 0.1067                                                          |
| <i>R</i> <sub>1</sub> (all data)                                 | <i>R</i> <sub>1</sub> = 0.0536                                             | 0.0410                                                                       | 0.0536                                                          |
| <i>wR</i> <sub>2</sub> (all data)                                | 0.0797                                                                     | 0.0853                                                                       | 0.1197                                                          |
| Largest diff. peak and hole [e. Å <sup>-3</sup> ]                | 0.830 and -0.874                                                           | 0.855 and -0.449                                                             | 0.257 and -0.203                                                |

$$^a R_1 = \frac{\sum ||F_0| - |F_c||}{\sum |F_0|} \quad ^b R_2 = \frac{[\sum w(F_0^2 - F_c^2)^2 / \sum w(F_0^2)^2]^{1/2}}{\sum w(F_0^2)^2}$$

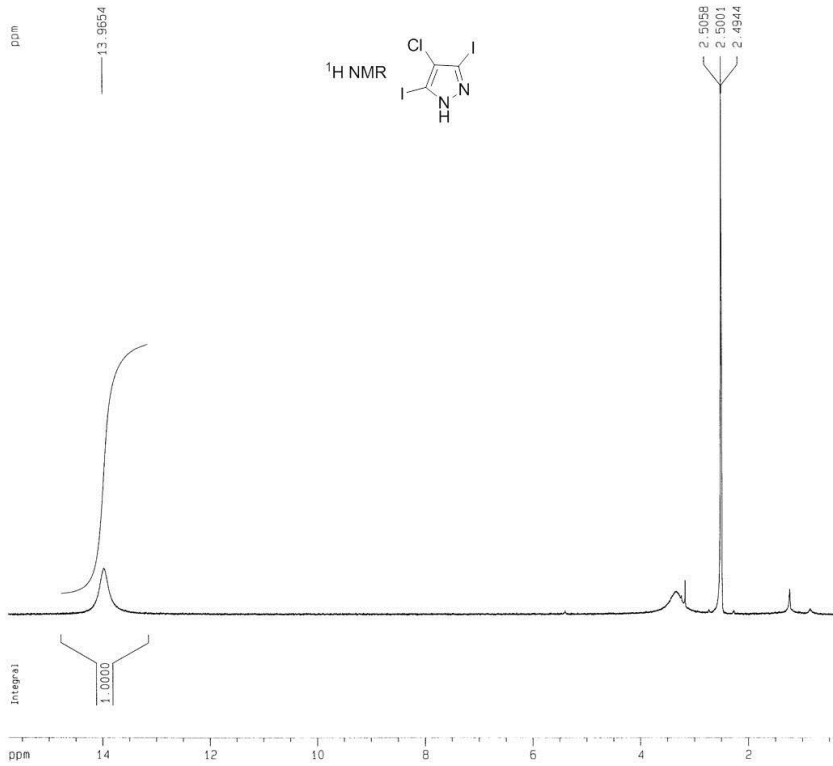

Current Data Parameters  
 NAME: dkgq11H  
 EXPNO: 1120  
 PROCNO: 1

F2 - Acquisition Parameters  
 Date\_: 20150206  
 Time: 22.32  
 INSTRUM: spect  
 PROBHD: 5 mm QNP 1H/13  
 PULPROG: zg  
 TD: 32768  
 SOLVENT: Acetone  
 NS: 8  
 DS: 0  
 SWH: 6613.757 Hz  
 FIDRES: 0.201836 Hz  
 AQ: 2.4773109 sec  
 RG: 724.1  
 DW: 75.600 usec  
 DE: 6.00 usec  
 TE: 300.0 K  
 D1: 1.00000000 sec

\*\*\*\*\* CHANNEL f1 \*\*\*\*\*  
 NUC1: 1H  
 P1: 3.00 usec  
 PL1: -4.00 dB  
 SF01: 300.1327000 MHz

F2 - Processing parameters  
 SI: 32768  
 SF: 300.1300024 MHz  
 WDW: EM  
 SSB: 0  
 LB: 0.30 Hz  
 GB: 0  
 PC: 1.00

ID NMR plot parameters  
 CX: 20.00 cm  
 CY: 12.50 cm  
 F1P: 15.755 ppm  
 F1: 4728.47 Hz  
 F2P: 0.388 ppm  
 F2: 116.35 Hz  
 PPMCM: 0.76835 ppm/cm  
 HZCM: 230.60576 Hz/cm

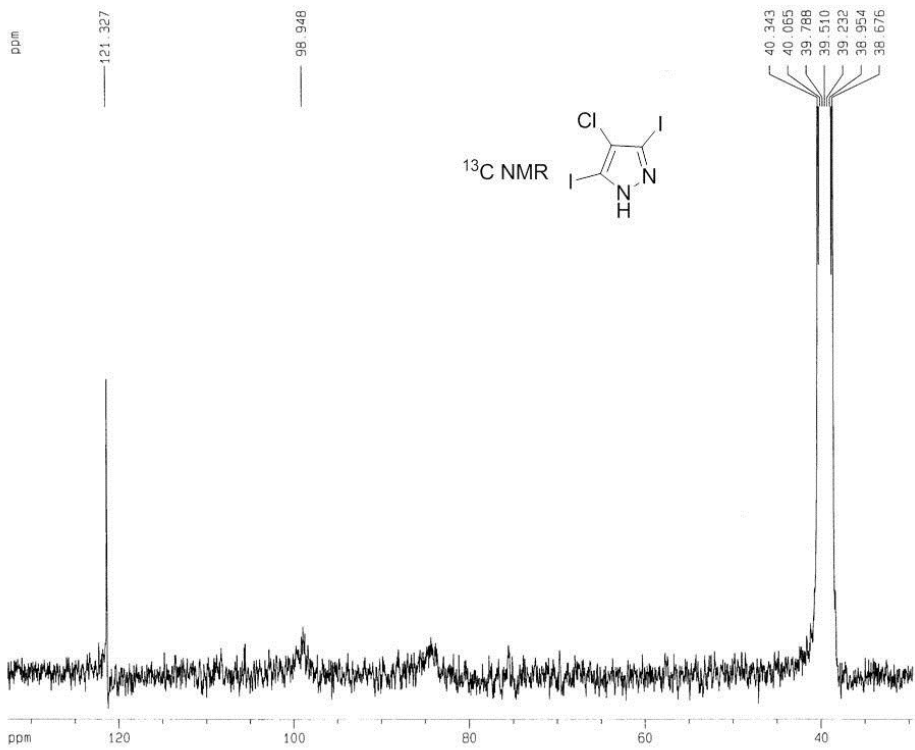

Current Data Parameters  
 NAME: dkgq13C  
 EXPNO: 1404  
 PROCNO: 1

F2 - Acquisition Parameters  
 Date\_: 20150206  
 Time: 22.35  
 INSTRUM: spect  
 PROBHD: 5 mm QNP 1H/13  
 PULPROG: zgpg  
 TD: 32768  
 SOLVENT: CDCl3  
 NS: 19640  
 DS: 0  
 SWH: 17985.611 Hz  
 FIDRES: 0.548977 Hz  
 AQ: 0.9100004 sec  
 RG: 18390.4  
 DW: 27.800 usec  
 DE: 6.00 usec  
 TE: 300.0 K  
 D1: 1.00000000 sec  
 d11: 0.03000000 sec  
 d12: 0.00002000 sec

\*\*\*\*\* CHANNEL f1 \*\*\*\*\*  
 NUC1: 13C  
 P1: 4.00 usec  
 PL1: -5.00 dB  
 SF01: 75.4752953 MHz

\*\*\*\*\* CHANNEL f2 \*\*\*\*\*  
 CPDPRG2: waltz16  
 NUC2: 1H  
 PCPD02: 100.00 usec  
 PL2: 120.00 dB  
 PL12: 17.00 dB  
 PL13: 17.00 dB  
 SF02: 300.1312005 MHz

F2 - Processing parameters  
 SI: 32768  
 SF: 75.4677903 MHz  
 WDW: EM  
 SSB: 0  
 LB: 3.00 Hz  
 GB: 0  
 PC: 1.40

ID NMR plot parameters  
 CX: 20.00 cm  
 CY: 200.00 cm  
 F1P: 132.656 ppm  
 F1: 10011.22 Hz  
 F2P: 29.573 ppm  
 F2: 2231.82 Hz  
 PPMCM: 5.15412 ppm/cm  
 HZCM: 389.97003 Hz/cm

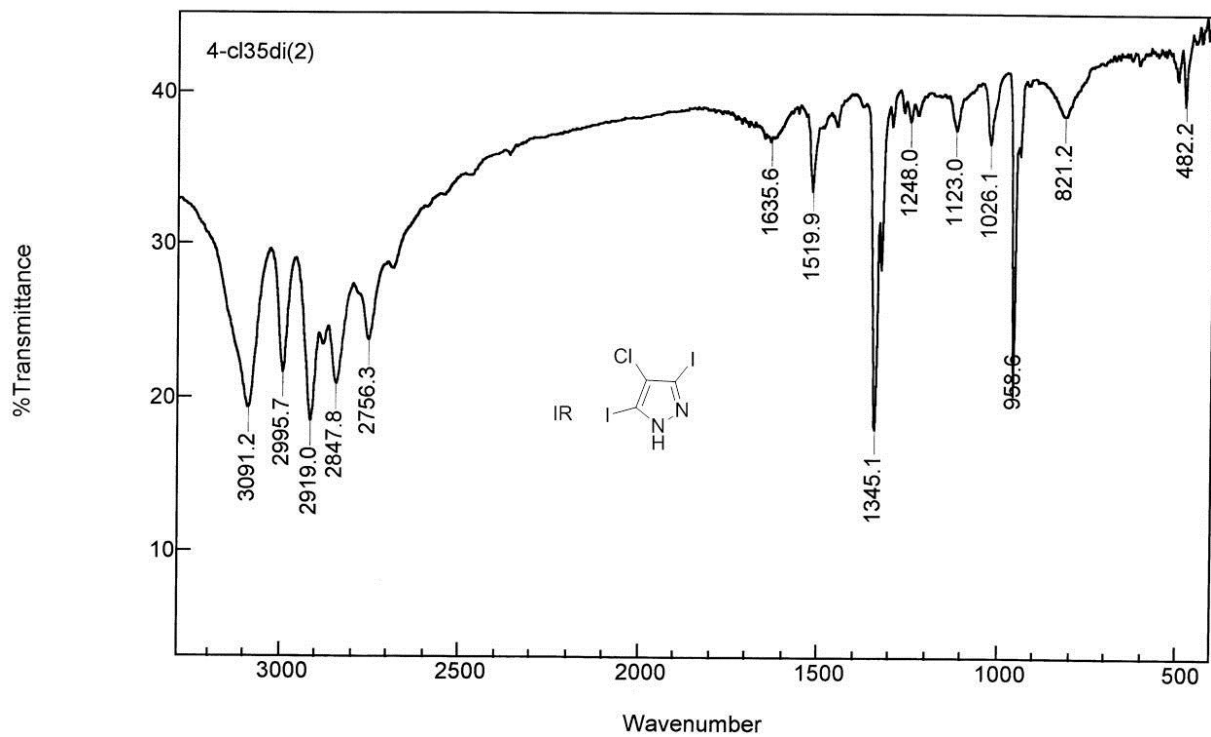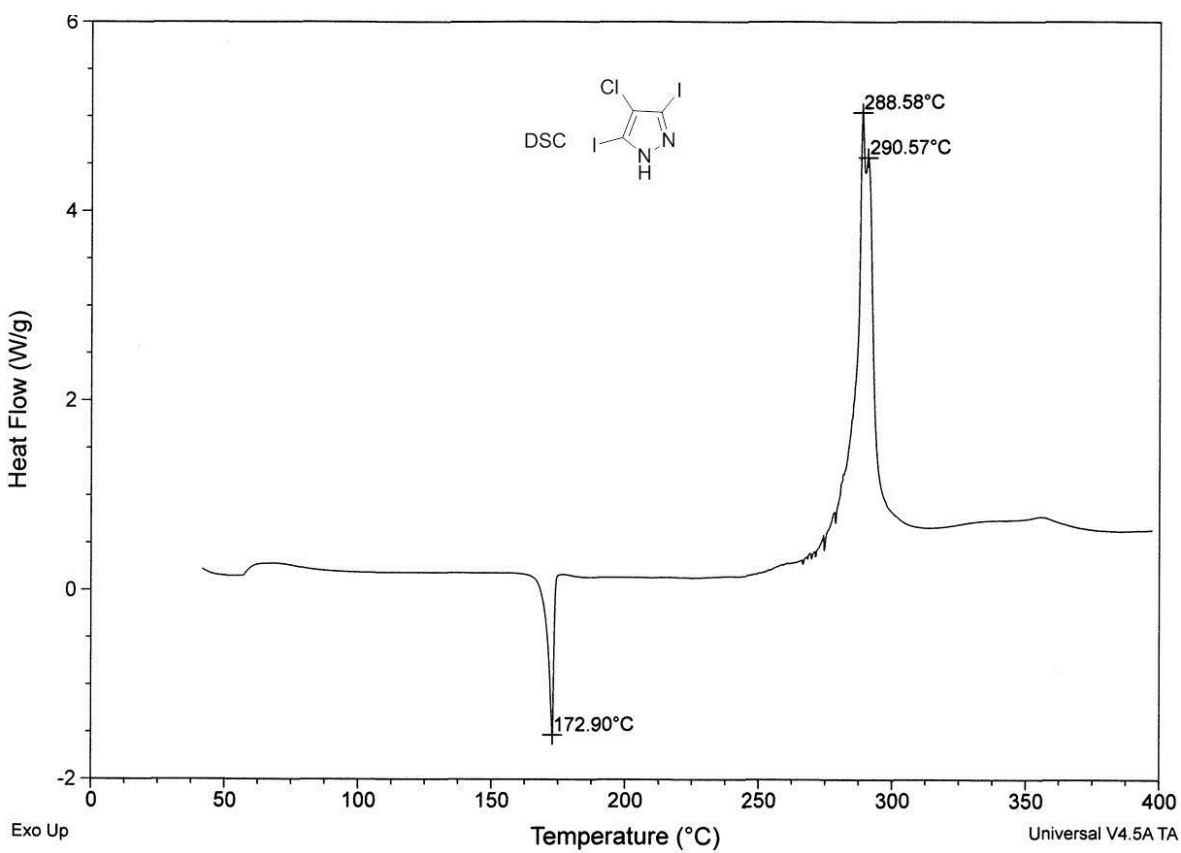

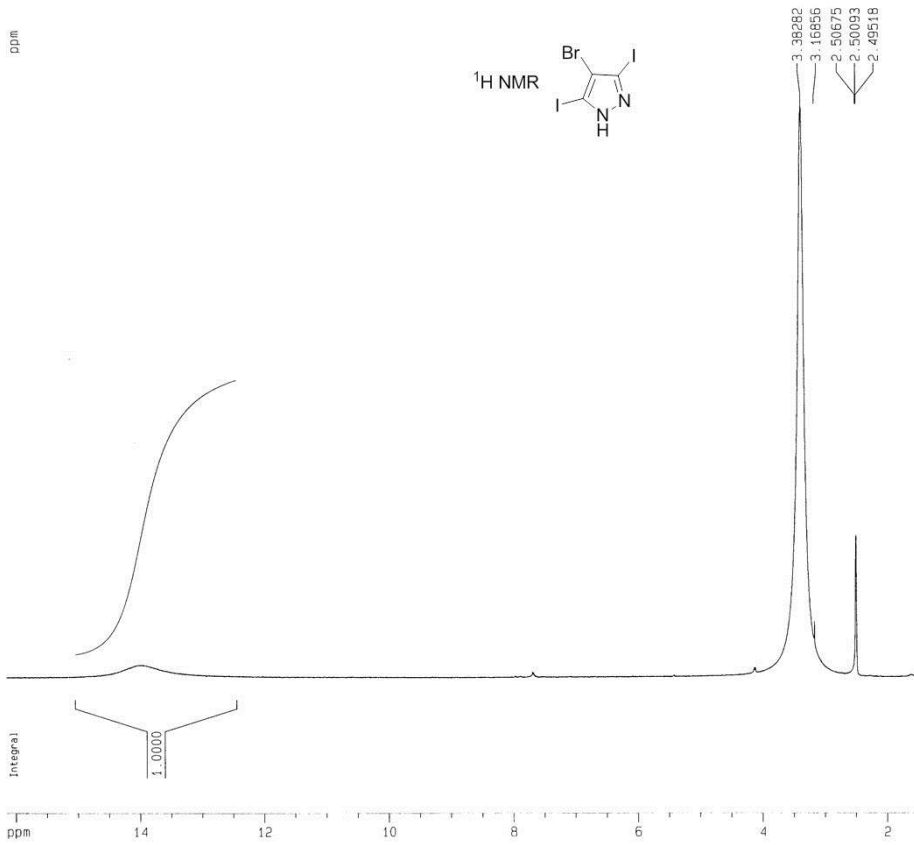

```

Current Data Parameters
NAME      dpkqnp1H
EXPNO     1132
PROCNO    1

F2 - Acquisition Parameters
Date_     20150210
Time      20.36
INSTRUM   spect
PROBHD    5 mm QNP 1H/13
PULPROG   zg
TD         32768
SOLVENT   Acetone
NS         8
DS         0
SWH       6613.757 Hz
FIDRES    0.201836 Hz
AQ        2.4773109 sec
RG         256
DW        75.600 usec
DE        6.00 usec
TE        300.0 K
D1        1.0000000 sec

***** CHANNEL f1 *****
NUC1      1H
P1        3.00 usec
PL1       -4.00 dB
SFO1     300.1327000 MHz

F2 - Processing parameters
SI        32768
SF        300.1300022 MHz
WDW       EM
SSB       0
LB        0.30 Hz
GB        0
PC        1.00

ID NMR plot parameters
CX        20.00 cm
CY        12.50 cm
F1P       16.151 ppm
F1        4847.31 Hz
F2P       1.497 ppm
F2        449.16 Hz
PPNMC     0.73271 ppm/cm
HZCM      219.90742 Hz/cm
  
```

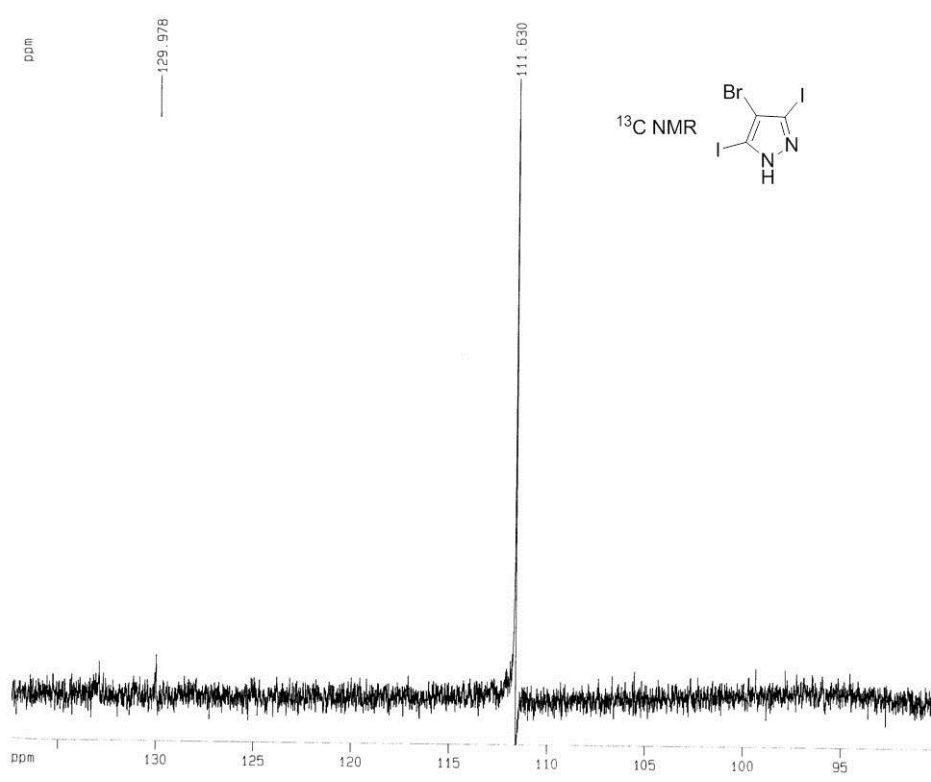

```

Current Data Parameters
NAME      dpkqnp13C
EXPNO     1413
PROCNO    1

F2 - Acquisition Parameters
Date_     20150211
Time      8.45
INSTRUM   spect
PROBHD    5 mm QNP 1H/13
PULPROG   zgpg
TD         32768
SOLVENT   CDC13
NS         18422
DS         0
SWH       17985.611 Hz
FIDRES    0.548877 Hz
AQ        0.9110004 sec
RG        18390.4
DW        27.800 usec
DE        6.00 usec
TE        300.0 K
D1        1.0000000 sec
d11       0.0300000 sec
d12       0.0002000 sec

***** CHANNEL f1 *****
NUC1      13C
P1        4.00 usec
PL1       -5.00 dB
SFO1     75.4752953 MHz

***** CHANNEL f2 *****
CPDPRG2   waltz16
NUC2      1H
PCPD2     100.00 usec
PL2       120.00 dB
PL12      17.00 dB
PL13      17.00 dB
SFO2     300.1312005 MHz

F2 - Processing parameters
SI        32768
SF        75.4676838 MHz
WDW       EM
SSB       0
LB        0.50 Hz
GB        0
PC        1.40

ID NMR plot parameters
CX        20.00 cm
CY        100.00 cm
F1P       137.364 ppm
F1        10366.53 Hz
F2P       90.160 ppm
F2        6804.14 Hz
PPNMC     2.35021 ppm/cm
HZCM      176.11938 Hz/cm
  
```

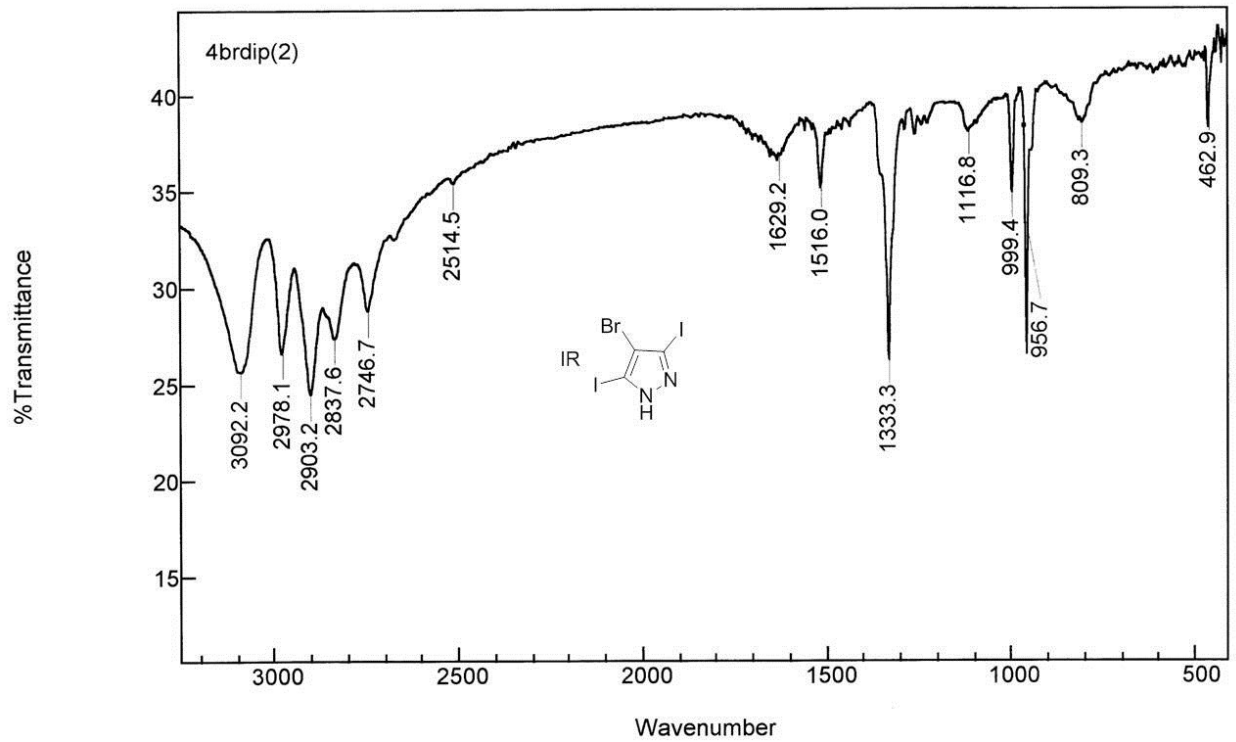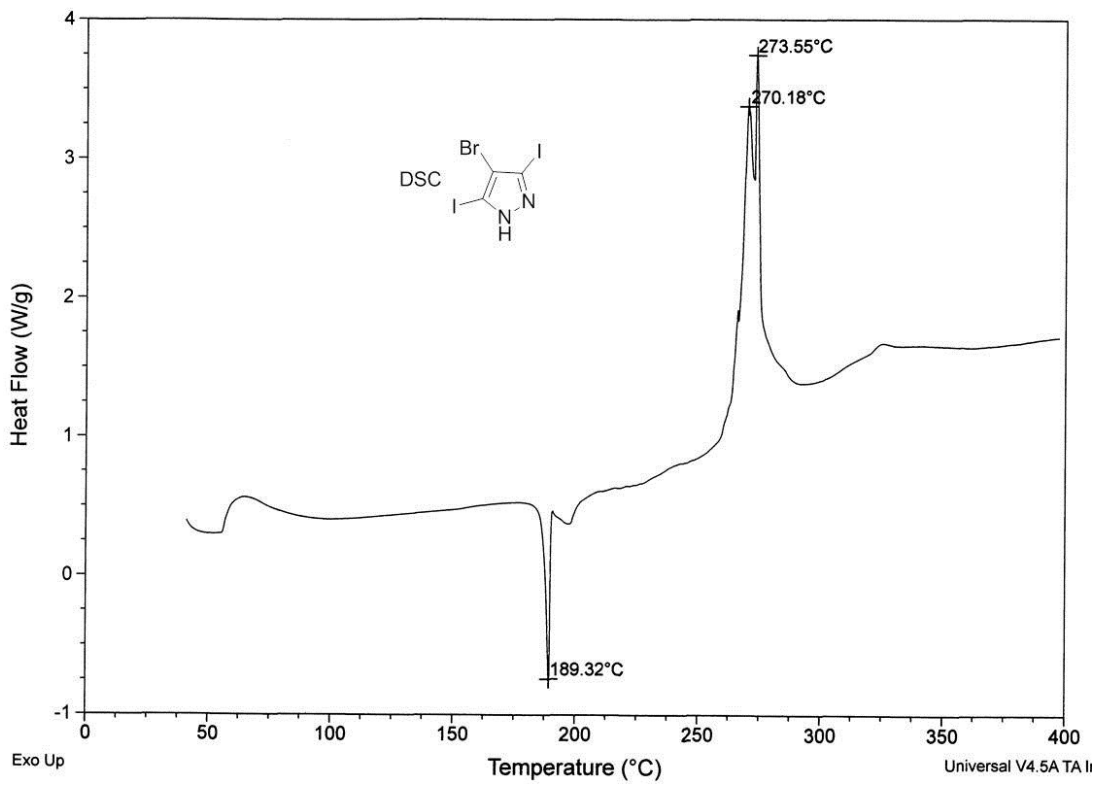



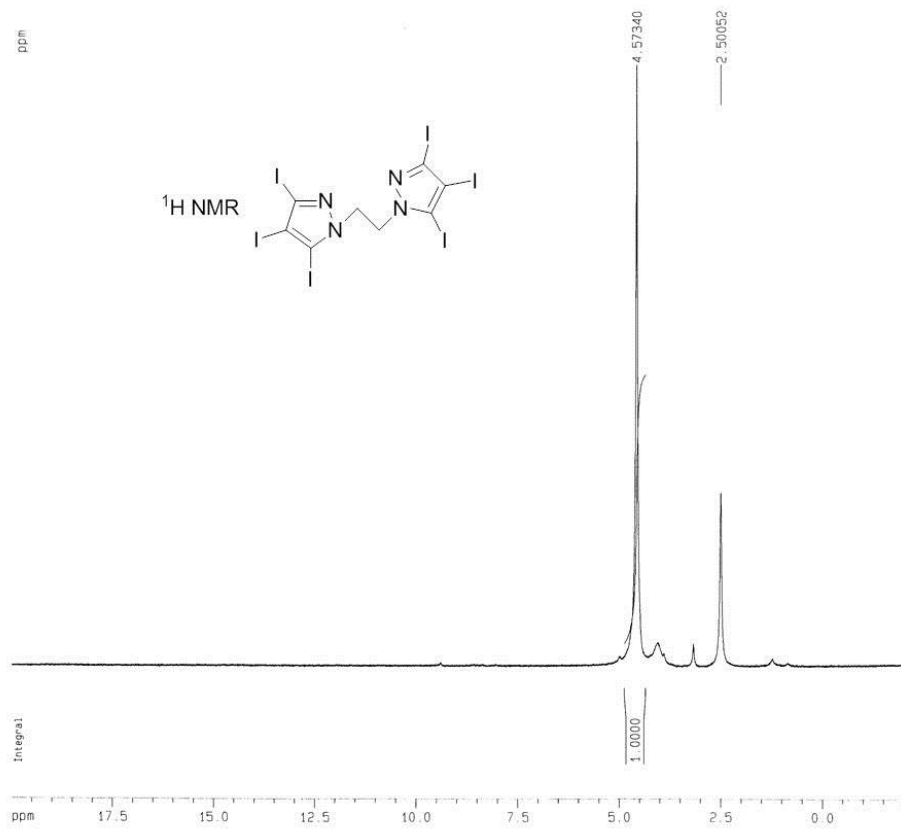

Current Data Parameters  
 NAME gpkqnd1H  
 EXPNO 1110  
 PROCNO 1

F2 - Acquisition Parameters  
 Date\_ 20150204  
 Time 10.56  
 INSTRUM spect  
 PROBHD 5 mm QNP 1H/13  
 PULPROG zg  
 TD 32768  
 SOLVENT Acetone  
 NS 8  
 DS 0  
 SMH 6613.757 Hz  
 FIDRES 0.201836 Hz  
 AQ 2.4773109 sec  
 RG 456.1  
 DW 75.600 usec  
 DE 6.00 usec  
 TE 300.0 K  
 D1 1.0000000 sec

\*\*\*\*\* CHANNEL f1 \*\*\*\*\*  
 NUC1 1H  
 P1 3.00 usec  
 PL1 -4.00 dB  
 SFO1 300.1327000 MHz

F2 - Processing parameters  
 SI 32768  
 SF 300.1300050 MHz  
 WDW EM  
 SSB 0  
 LB 0.30 Hz  
 GB 0  
 PC 1.00

1D NMR plot parameters  
 CX 20.00 cm  
 CY 12.50 cm  
 FIP 20.000 ppm  
 F1 6002.60 Hz  
 F2P -2.008 ppm  
 F2 -602.54 Hz  
 PPMCM 1.10038 ppm/cm  
 HZCM 330.25696 Hz/cm

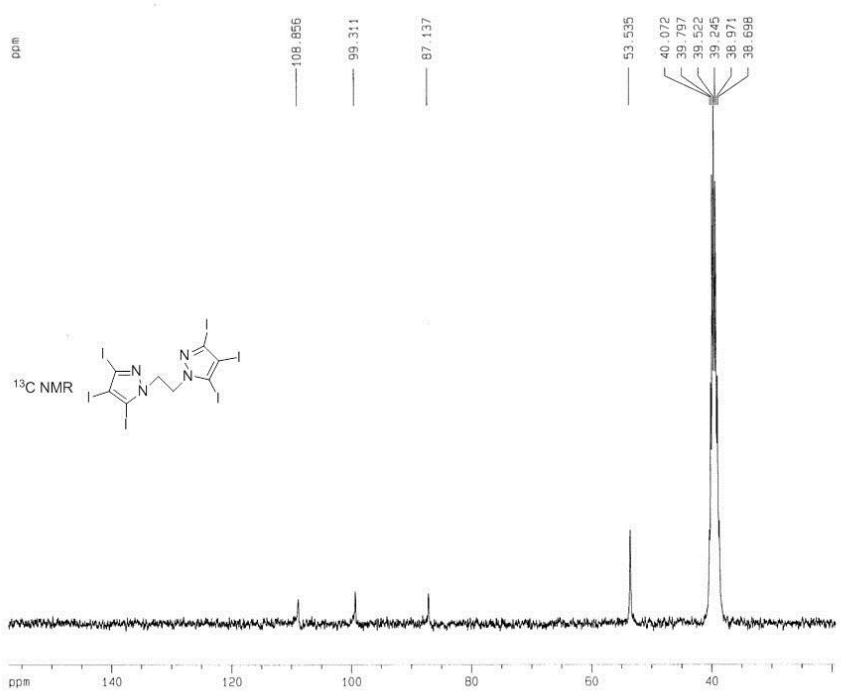

Current Data Parameters  
 NAME gpkqnd13C  
 EXPNO 1298  
 PROCNO 1

F2 - Acquisition Parameters  
 Date\_ 20150204  
 Time 10.58  
 INSTRUM spect  
 PROBHD 5 mm QNP 1H/13  
 PULPROG zgpg30  
 TD 32768  
 SOLVENT CDCl3  
 NS 2635  
 DS 0  
 SMH 17985.611 Hz  
 FIDRES 0.548877 Hz  
 AQ 0.9110004 sec  
 RG 18390.4  
 DW 27.800 usec  
 DE 6.00 usec  
 TE 300.0 K  
 D1 1.0000000 sec  
 d11 0.0300000 sec  
 d12 0.0000000 sec

\*\*\*\*\* CHANNEL f1 \*\*\*\*\*  
 NUC1 13C  
 P1 4.00 usec  
 PL1 -5.00 dB  
 SFO1 75.4752953 MHz

\*\*\*\*\* CHANNEL f2 \*\*\*\*\*  
 CPDPRG2 waltz16  
 NUC2 1H  
 PCDP2 100.00 usec  
 PL2 120.00 dB  
 PL12 17.00 dB  
 PL13 17.00 dB  
 SFO2 300.1312005 MHz

F2 - Processing parameters  
 SI 32768  
 SF 75.4677519 MHz  
 WDW EM  
 SSB 0  
 LB 3.00 Hz  
 GB 0  
 PC 1.40

1D NMR plot parameters  
 CX 20.00 cm  
 CY 12.50 cm  
 FIP 157.222 ppm  
 F1 11965.16 Hz  
 F2P 19.366 ppm  
 F2 1461.51 Hz  
 PPMCM 6.89278 ppm/cm  
 HZCM 520.18268 Hz/cm

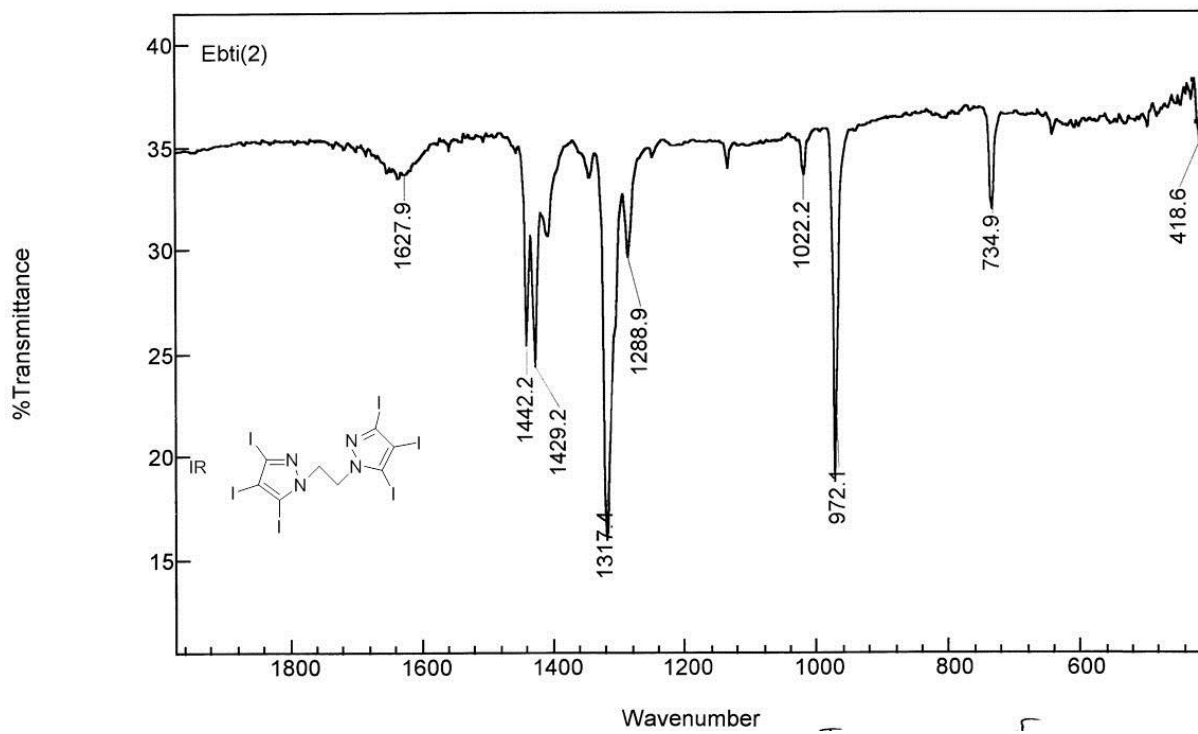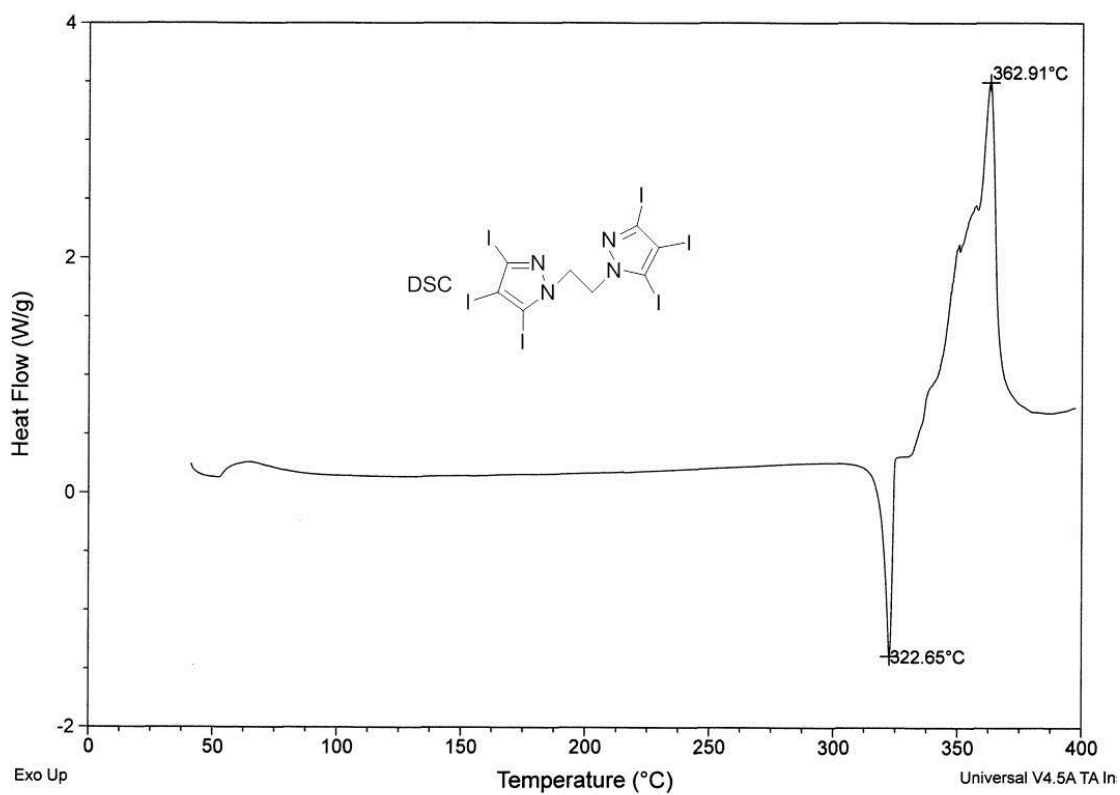

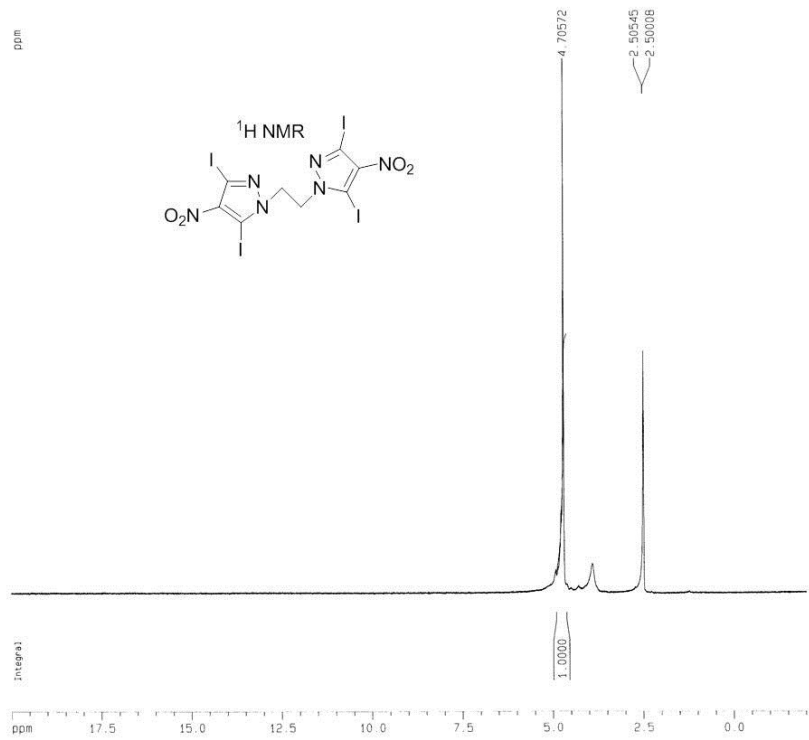

Current Data Parameters  
 NAME d6knp1H  
 EXPNO 1213  
 PROCNO 1

F2 - Acquisition Parameters  
 Date\_ 20150317  
 Time 16.29  
 INSTRUM spect  
 PROBHD 5 mm QNP 1H/13  
 PULPROG zg  
 TD 32768  
 SOLVENT Acetone  
 NS 8  
 DS 0  
 SWH 6613.757 Hz  
 FIDRES 0.201836 Hz  
 AQ 2.4773109 sec  
 RG 645.1  
 DW 75.600 usec  
 DE 6.00 usec  
 TE 300.0 K  
 D1 1.0000000 sec

\*\*\*\*\* CHANNEL f1 \*\*\*\*\*  
 NUC1 1H  
 P1 3.00 usec  
 PL1 -4.00 dB  
 SFO1 300.1327000 MHz

F2 - Processing parameters  
 SI 32768  
 SF 300.1300022 MHz  
 WDW EM  
 SSB 0  
 LB 0.30 Hz  
 GB 0  
 PC 1.00

ID NMR plot parameters  
 CX 20.00 cm  
 CY 12.50 cm  
 F1P 20.000 ppm  
 F1 6002.60 Hz  
 F2P -2.008 ppm  
 F2 -602.54 Hz  
 FWHM 1.10038 ppm/cm  
 HZCM 330.25696 Hz/cm

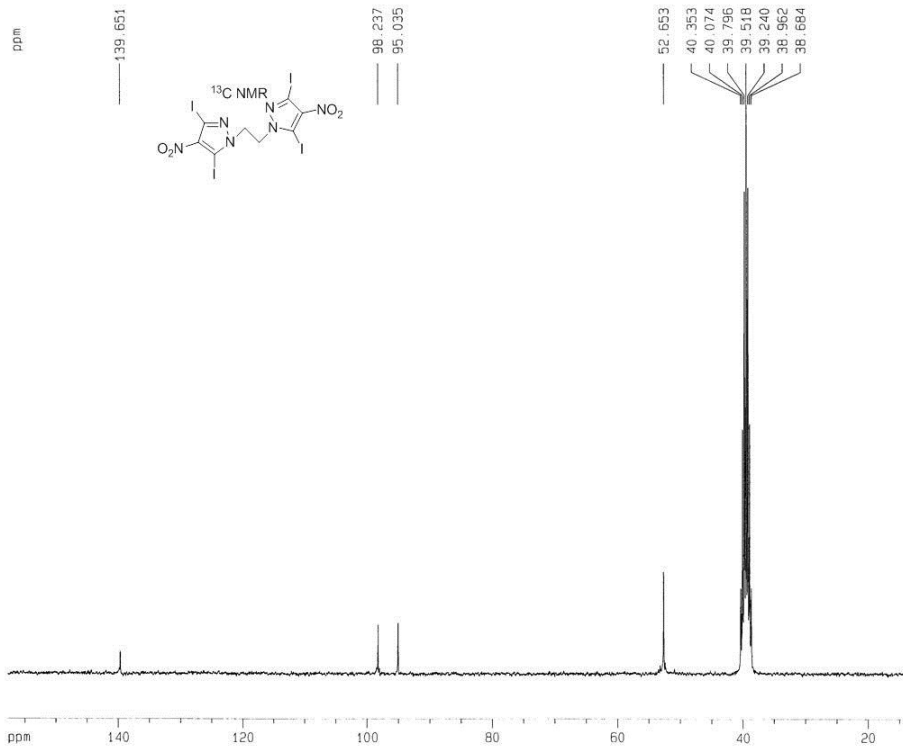

Current Data Parameters  
 NAME d6knp13C  
 EXPNO 1460  
 PROCNO 1

F2 - Acquisition Parameters  
 Date\_ 20150312  
 Time 22.10  
 INSTRUM spect  
 PROBHD 5 mm QNP 1H/13  
 PULPROG zgpg  
 TD 32768  
 SOLVENT CDCl3  
 NS 2208  
 DS 0  
 SWH 17985.611 Hz  
 FIDRES 0.548877 Hz  
 AQ 0.9110004 sec  
 RG 18390.4  
 DW 27.800 usec  
 DE 6.00 usec  
 TE 300.0 K  
 D1 1.0000000 sec  
 d11 0.0300000 sec  
 d12 0.0002000 sec

\*\*\*\*\* CHANNEL f1 \*\*\*\*\*  
 NUC1 13C  
 P1 4.00 usec  
 PL1 -5.00 dB  
 SFO1 75.4752953 MHz

\*\*\*\*\* CHANNEL f2 \*\*\*\*\*  
 CPDPRG2 waltz16  
 NUC2 1H  
 PCDP2 100.00 usec  
 PL2 120.00 dB  
 PL12 17.00 dB  
 PL13 17.00 dB  
 SFO2 300.1312005 MHz

F2 - Processing parameters  
 SI 32768  
 SF 75.4677892 MHz  
 WDW EM  
 SSB 0  
 LB 3.00 Hz  
 GB 0  
 PC 1.40

ID NMR plot parameters  
 CX 20.00 cm  
 CY 12.50 cm  
 F1P 157.787 ppm  
 F1 11907.81 Hz  
 F2P 13.967 ppm  
 F2 1054.04 Hz  
 FWHM 7.19100 ppm/cm  
 HZCM 542.68860 Hz/cm

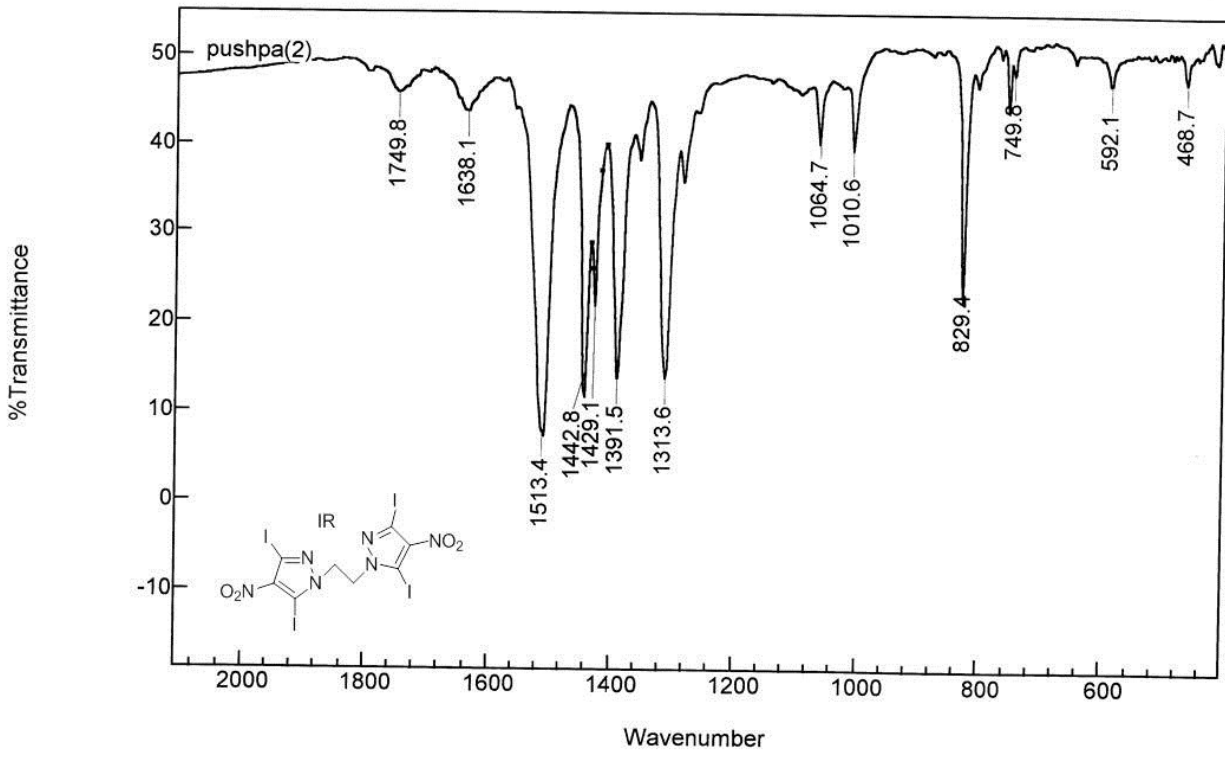

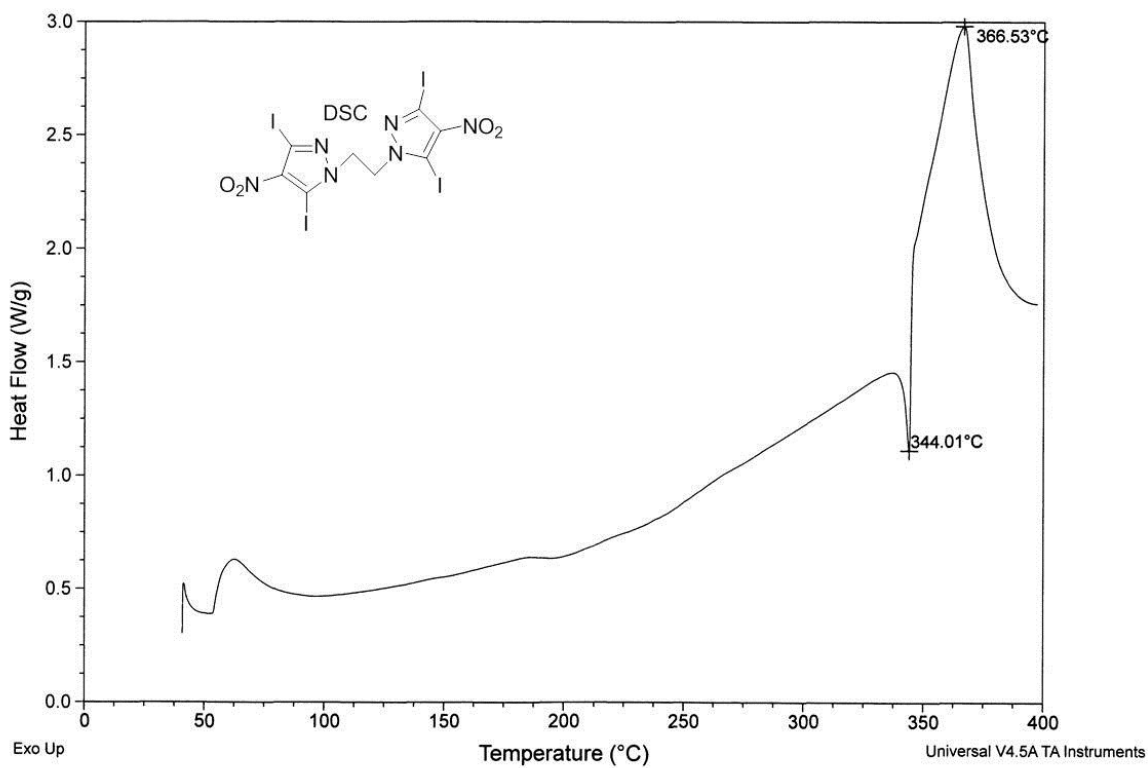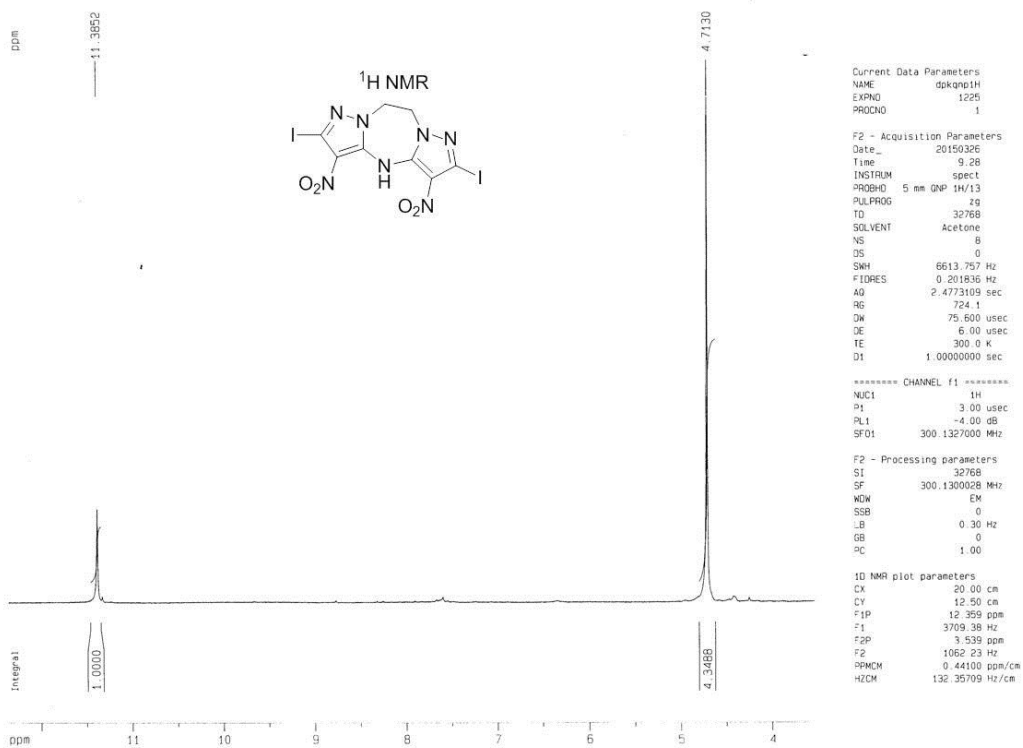

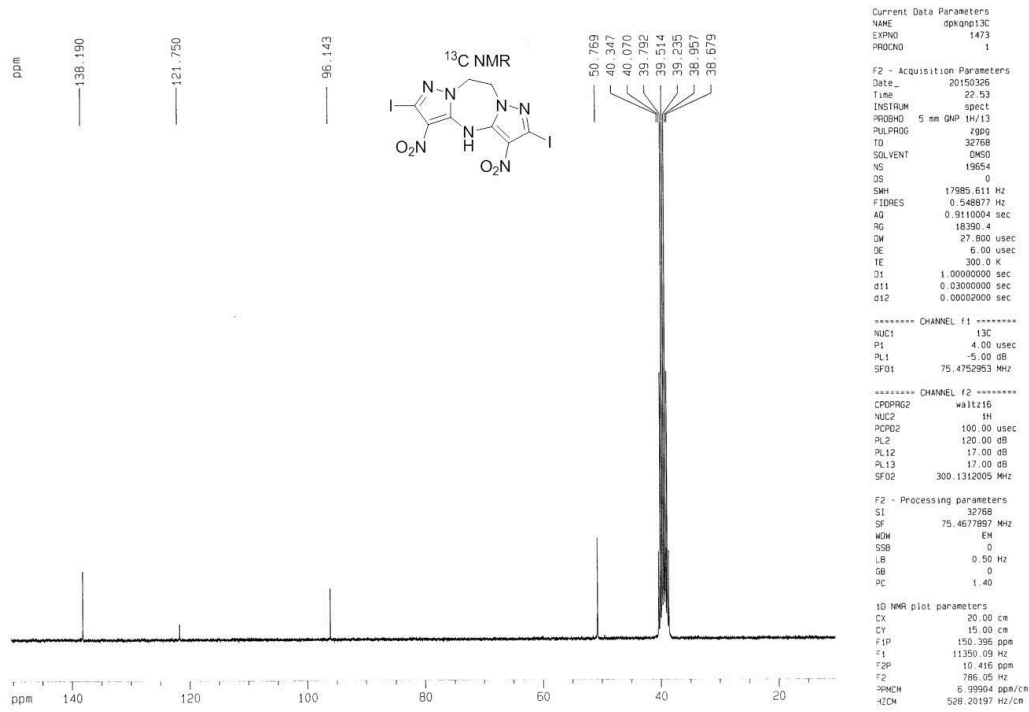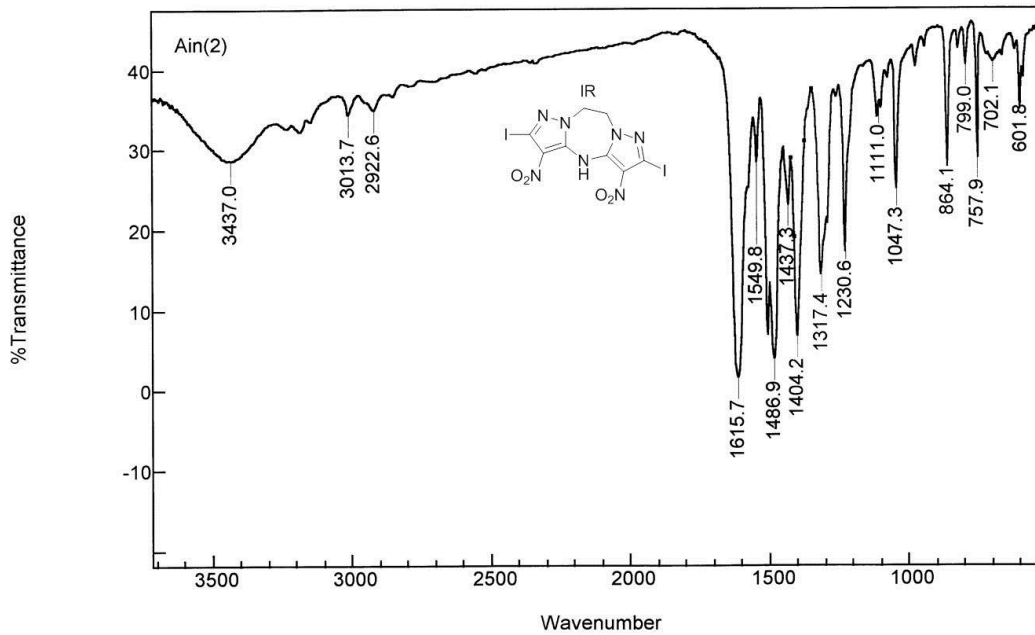

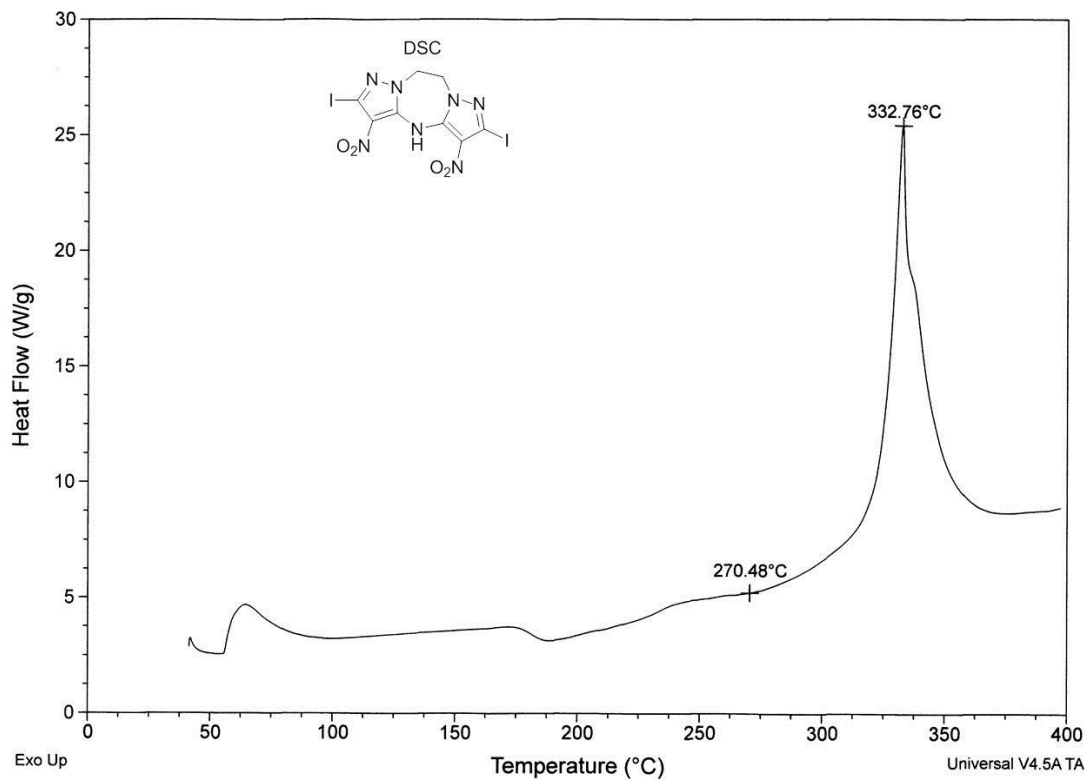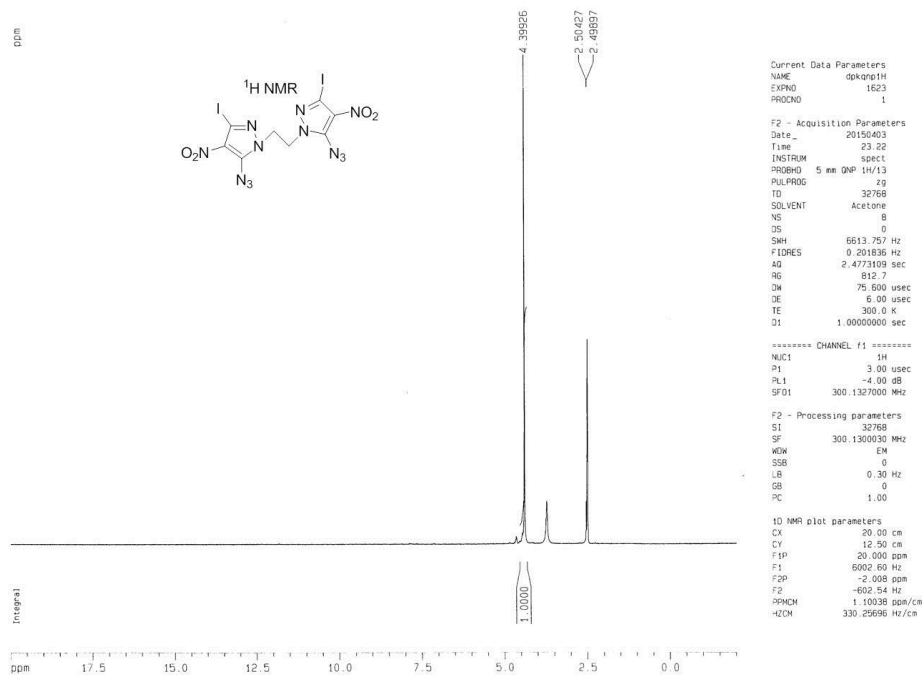

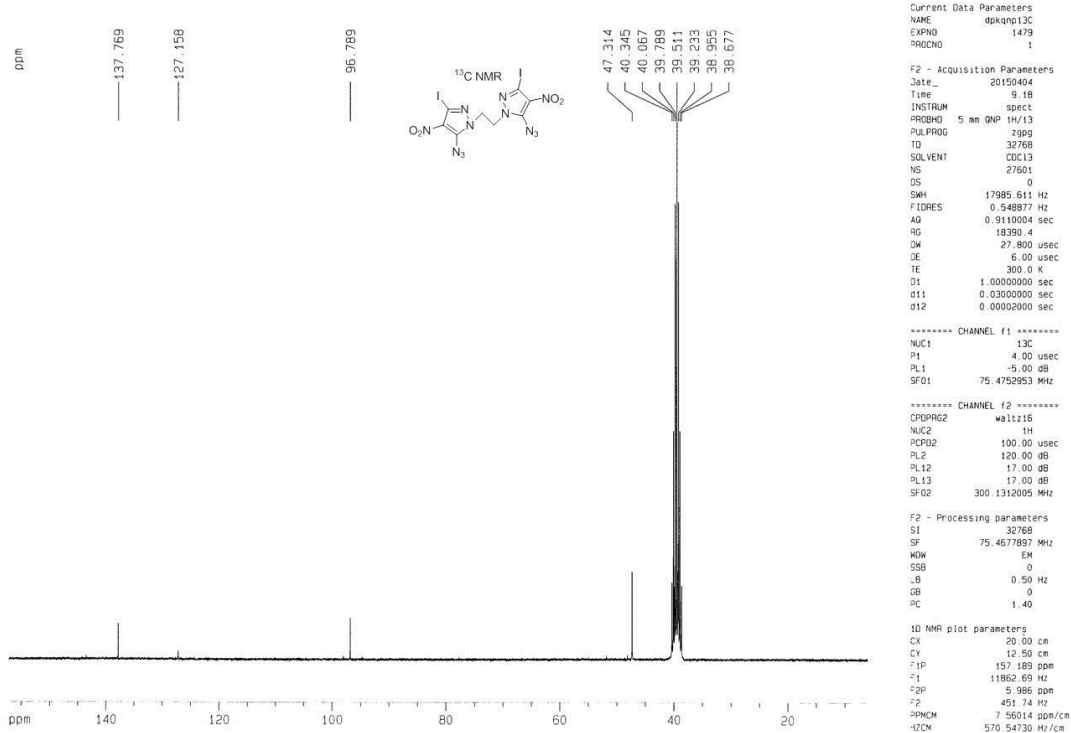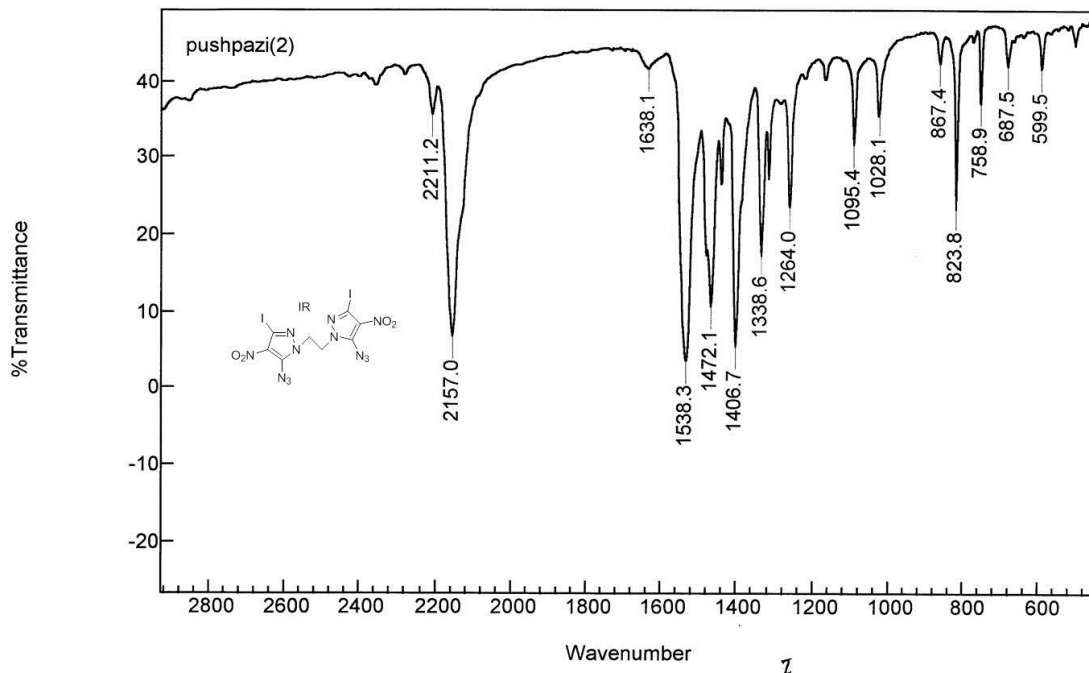



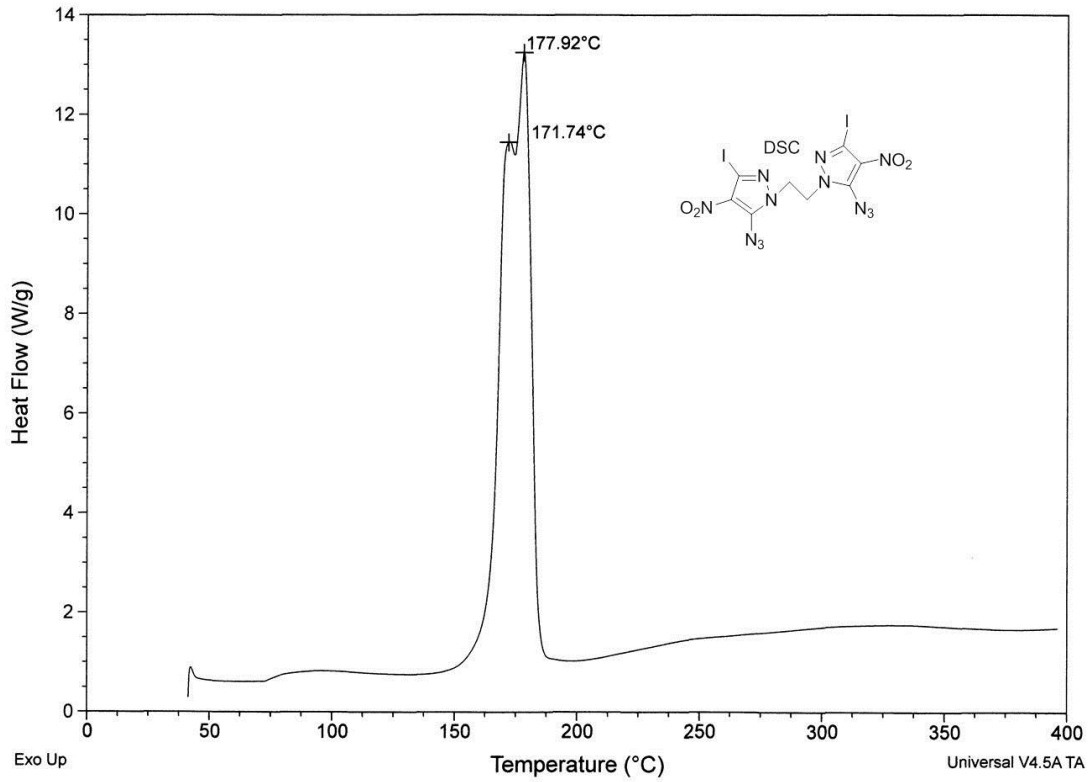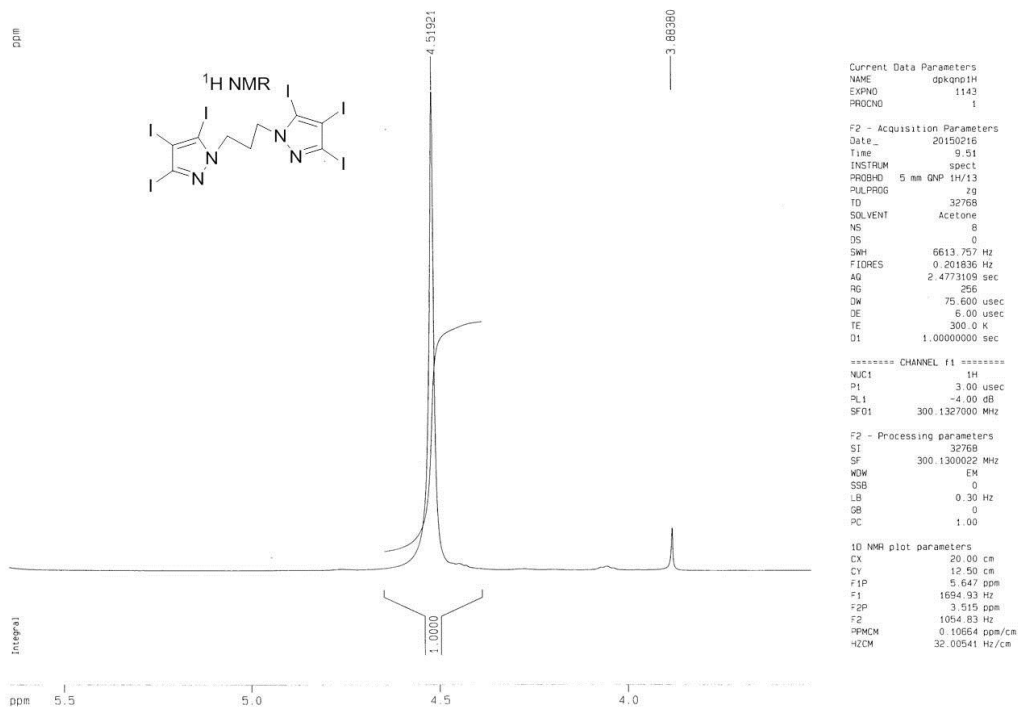

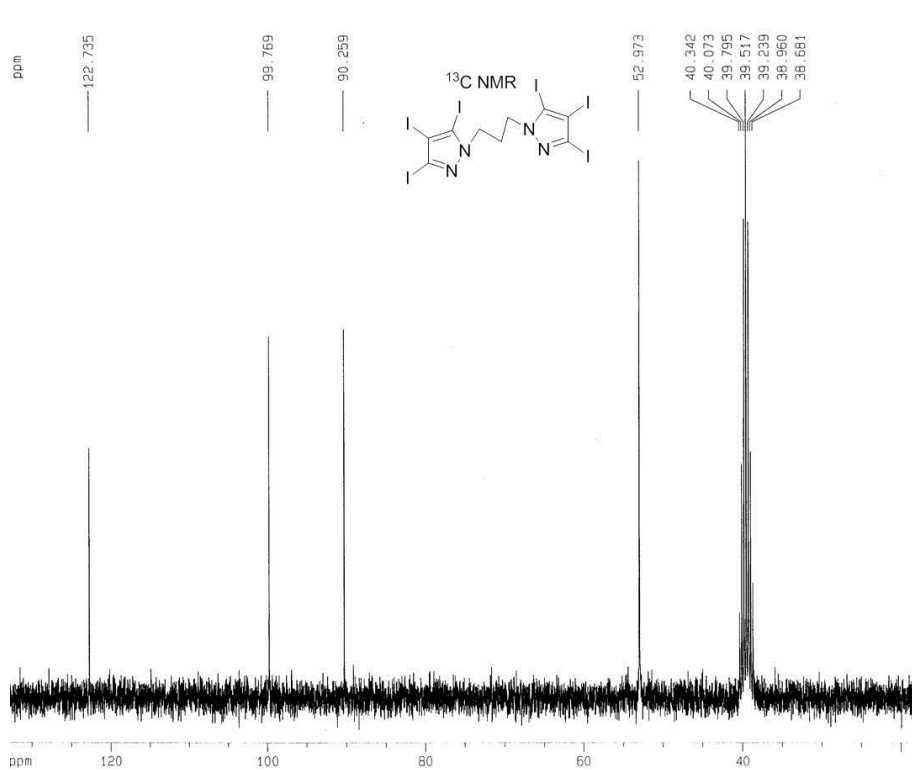

```

Current Data Parameters
NAME      opkqnp13C
EXPNO    1421
PROCNO   1

F2 - Acquisition Parameters
Date_    20150216
Time     9.54
INSTRUM  spect
PROBHD   5 mm QNP 1H/13
PULPROG  zgpg
TD        32768
SOLVENT  CDCl3
NS        94
DS        0
SWH       17985.611 Hz
FIDRES   0.548877 Hz
AQ        0.9110004 sec
RG        18390.4
DM        27.800 usec
DE        6.00 usec
TE        300.0 K
D1        1.0000000 sec
d11       0.0300000 sec
d12       0.0002000 sec

----- CHANNEL f1 -----
NUC1      13C
P1        4.00 usec
PL1       -5.00 dB
SFO1      75.4752953 MHz

----- CHANNEL f2 -----
CPDPRG2  waltz16
NUC2      1H
PCPD2    100.00 usec
PL2       120.00 dB
PL12      17.00 dB
PL13      17.00 dB
SFO2      300.1312005 MHz

F2 - Processing parameters
SI         32768
SF         75.4677903 MHz
WDW        EM
SSB        0
LB         0.50 Hz
GB         0
PC         1.40

1D NMR plot parameters
CX         20.00 cm
CY         12.50 cm
F1P        132.956 ppm
F1         10033.50 Hz
F2P        16.453 ppm
F2         1392.64 Hz
PPMCM      5.72513 ppm/cm
HZCM       432.06296 Hz/cm
  
```

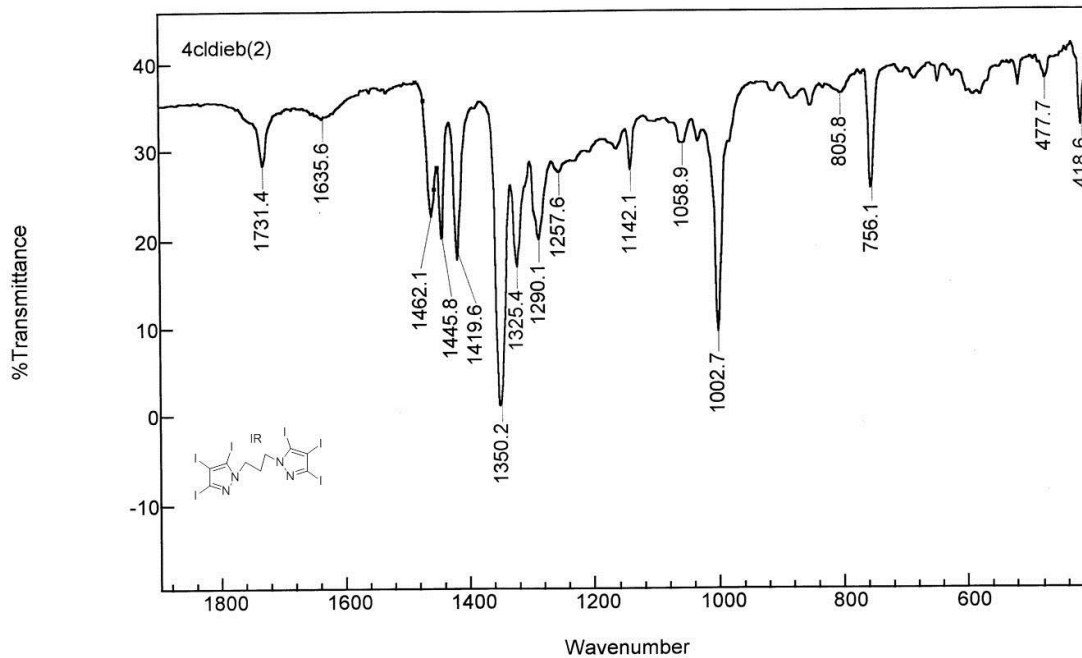

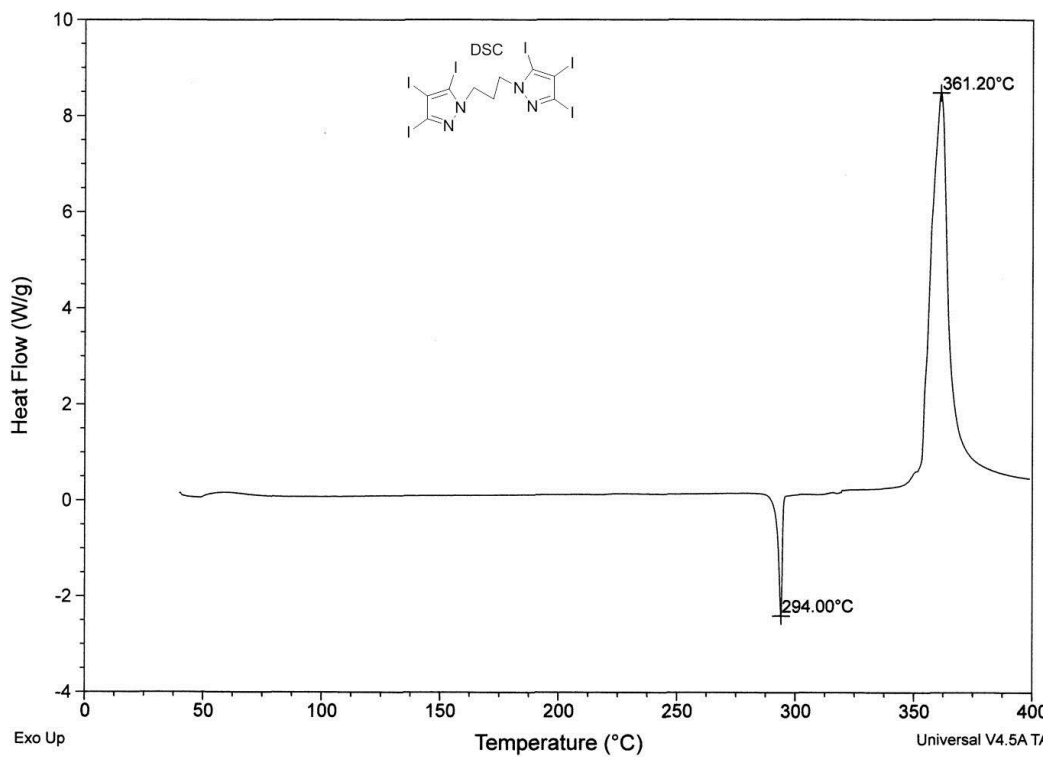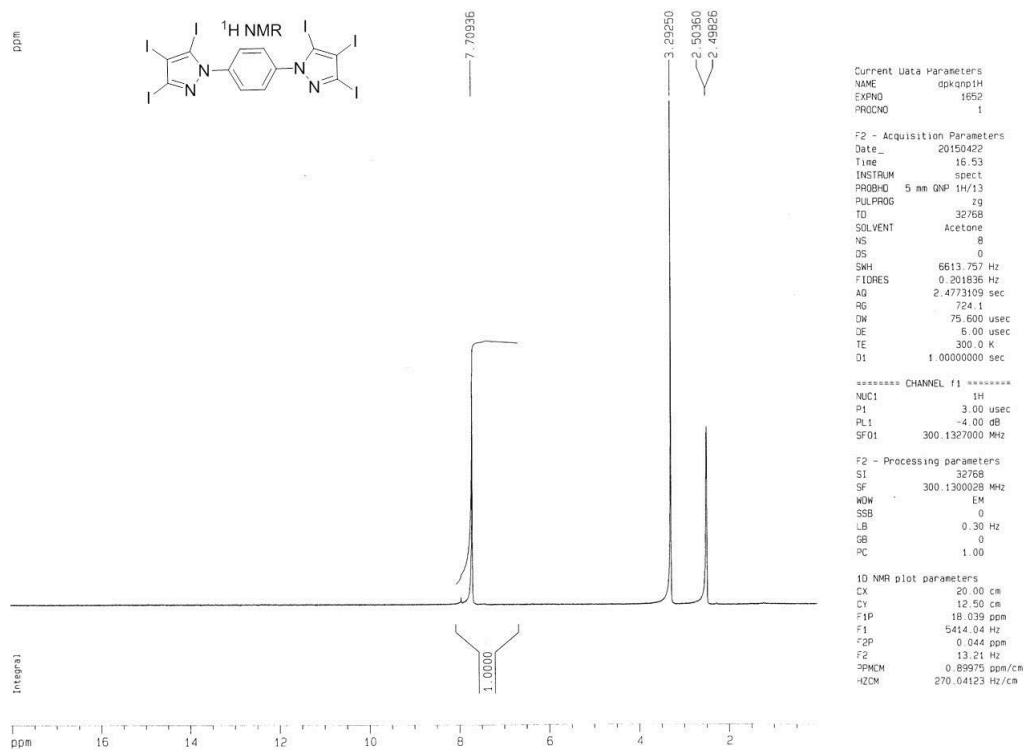

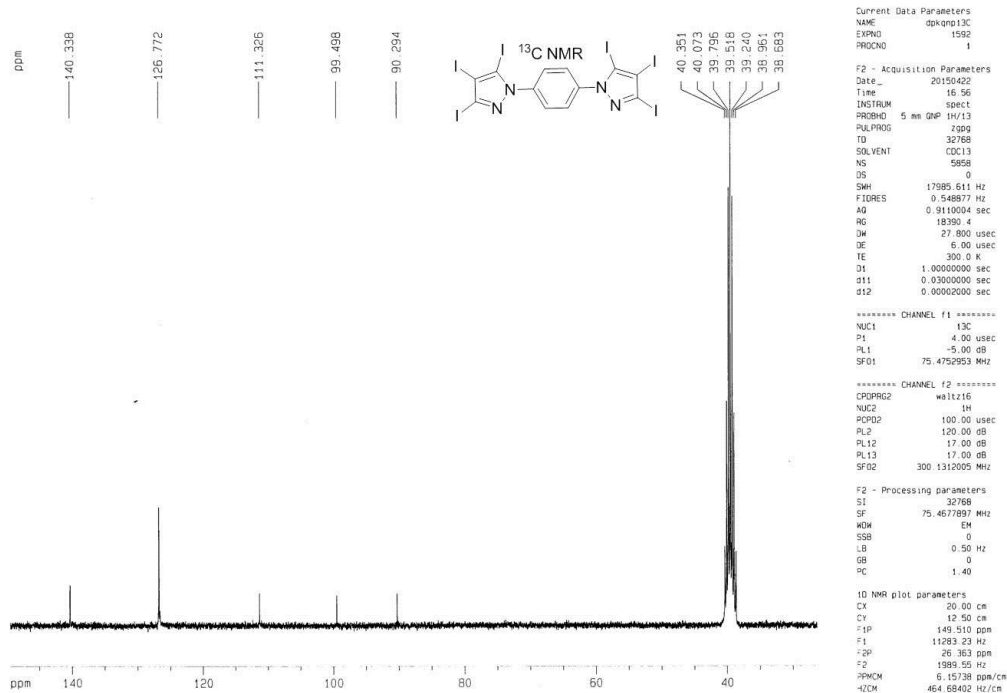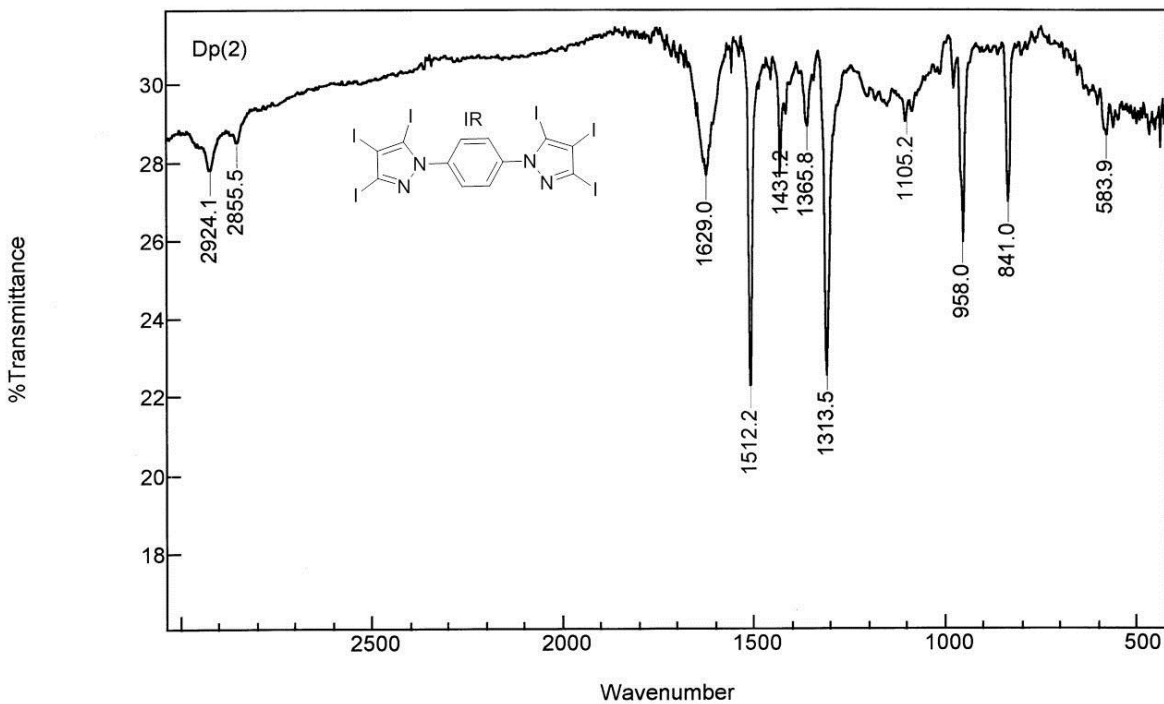

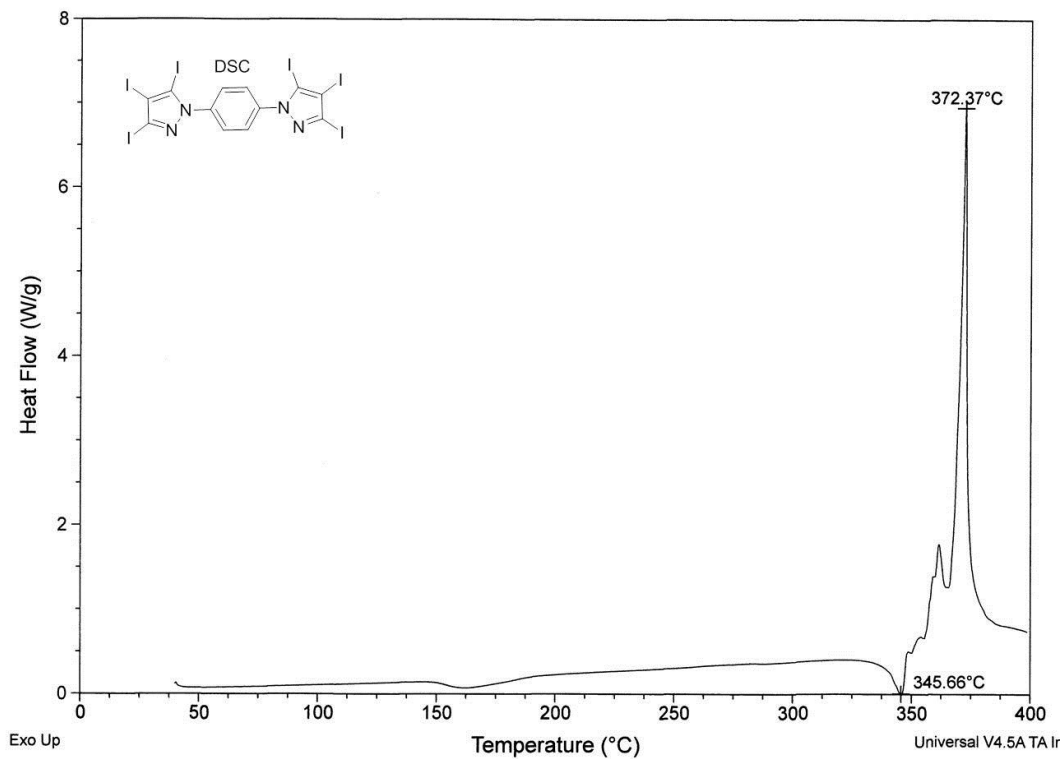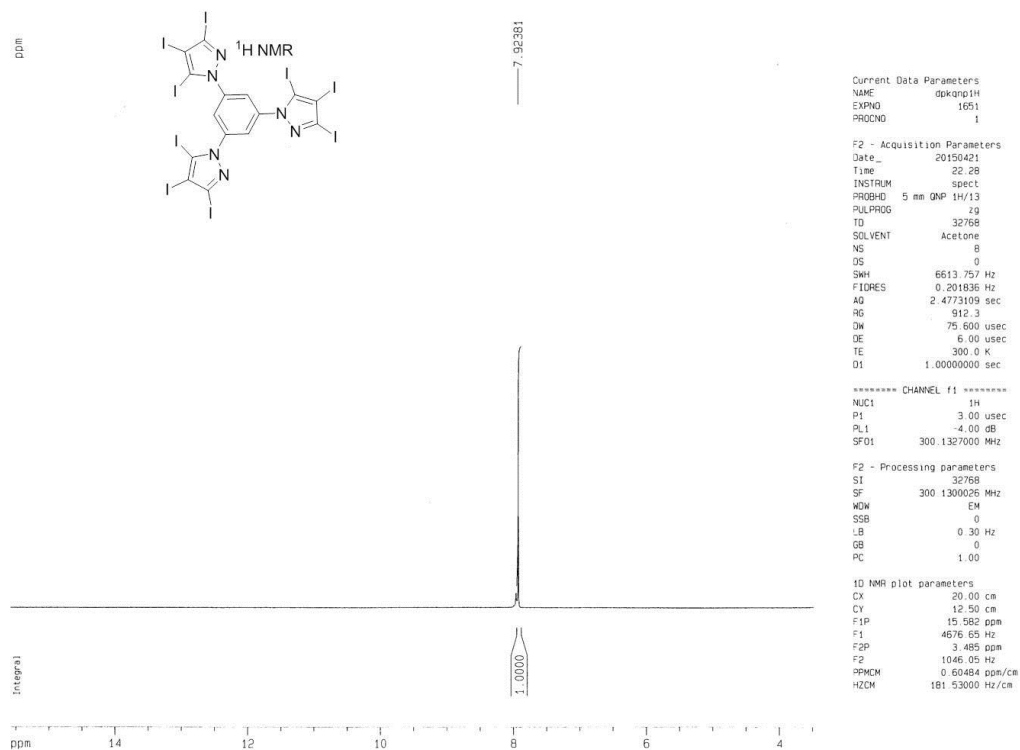

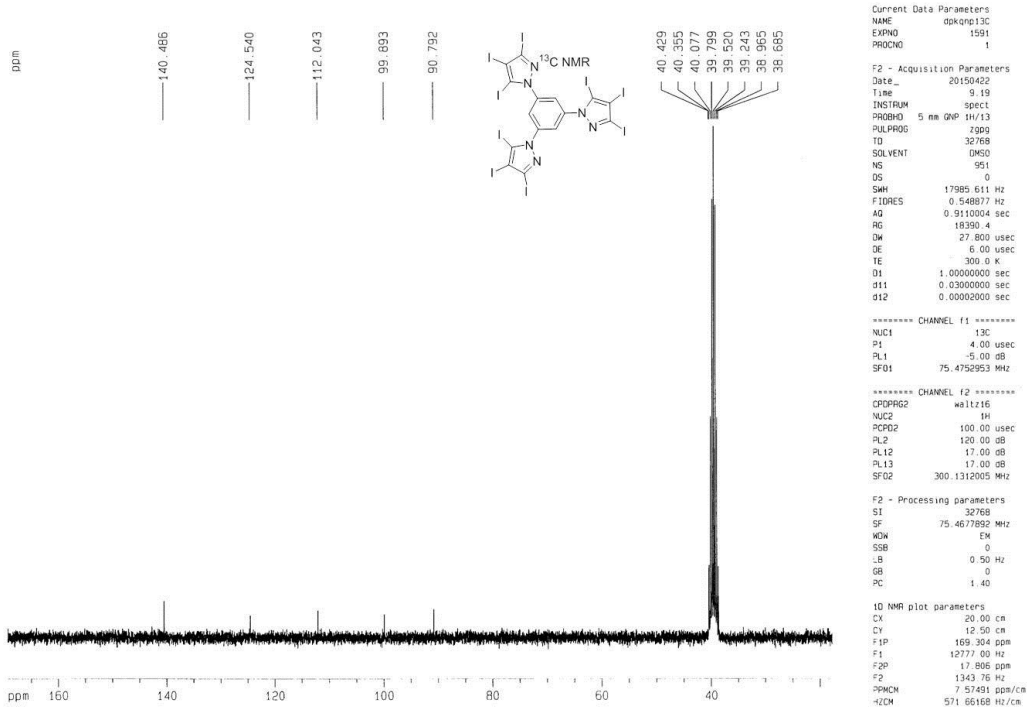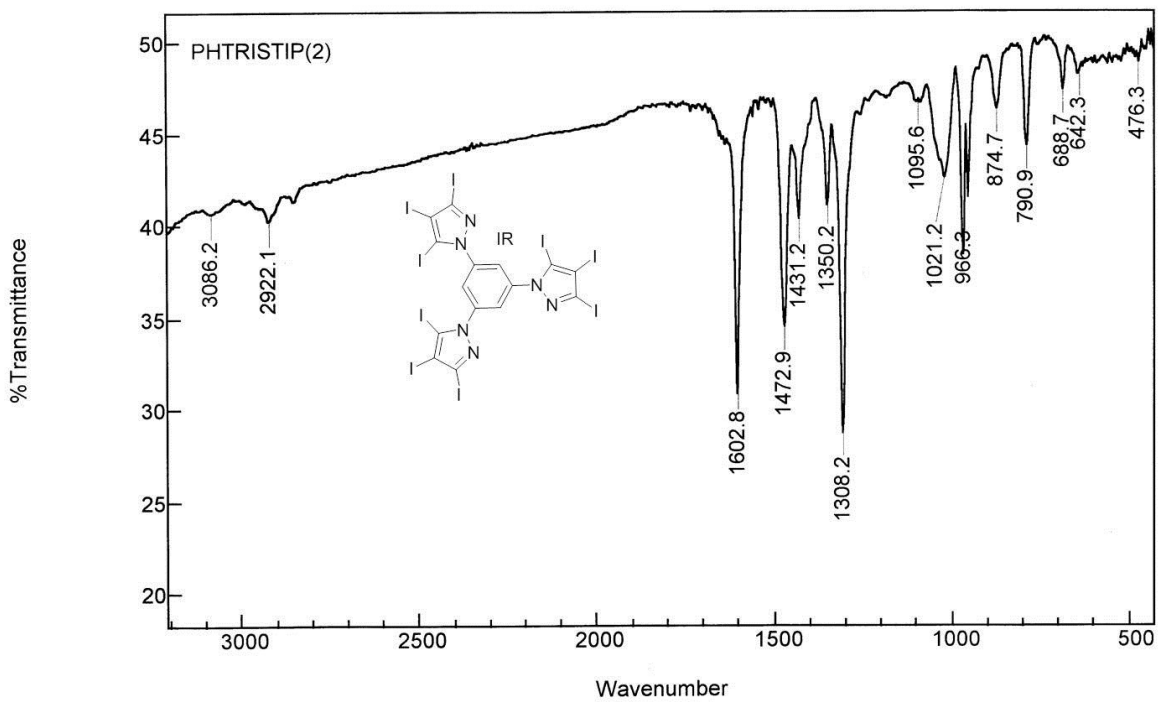

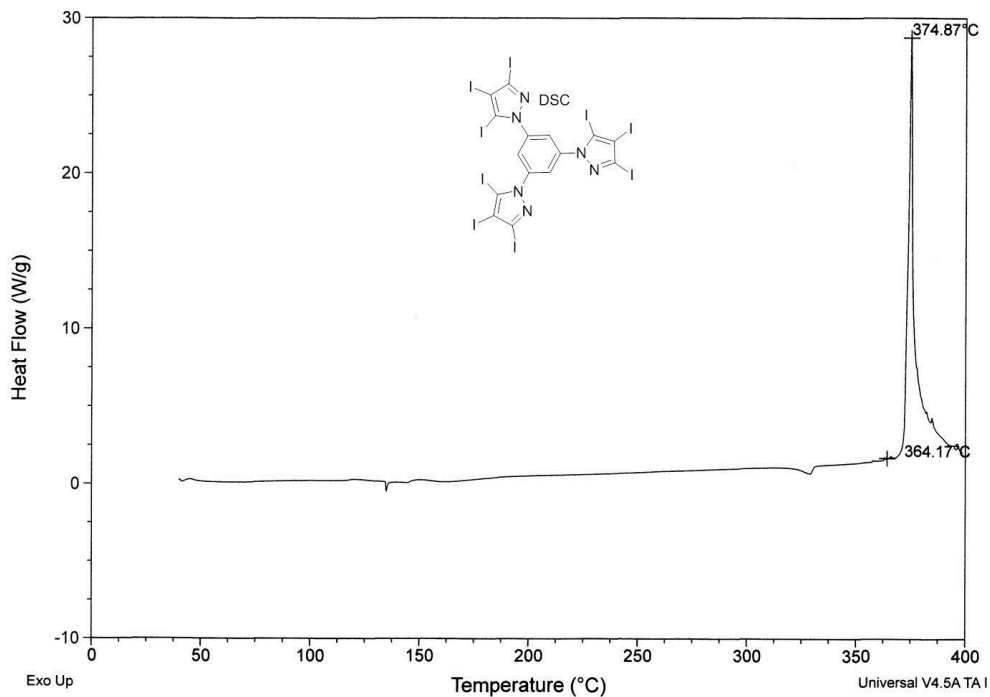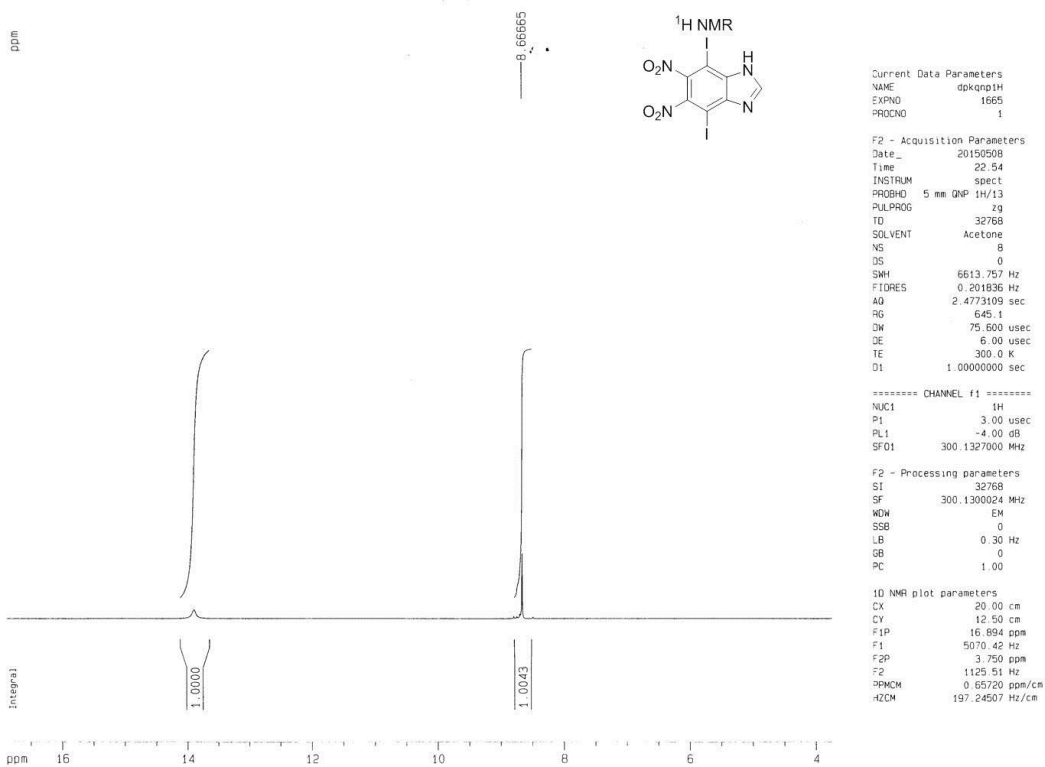

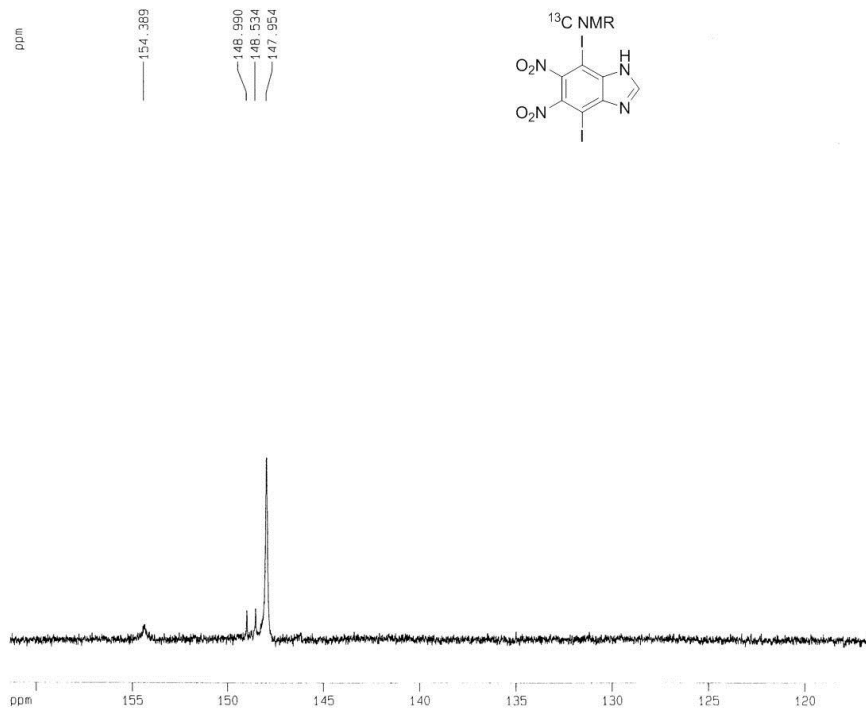

Current Data Parameters  
 NAME: dpkqp13c  
 EXPNO: 1605  
 PROCNO: 1

F2 - Acquisition Parameters  
 Date\_: 20150509  
 Time: 17.10  
 INSTRUM: spect  
 PROBHD: 5 mm GNP 1H/13  
 PULPROG: zgpg  
 TD: 32768  
 SOLVENT: CDCl3  
 NS: 32997  
 DS: 0  
 SWH: 17995.611 Hz  
 FIDRES: 0.548977 Hz  
 AQ: 0.9110004 sec  
 RG: 18390.4  
 DW: 27.900 usec  
 DE: 6.00 usec  
 TE: 300.0 K  
 D1: 1.0000000 sec  
 d11: 0.0300000 sec  
 d12: 0.0002000 sec

\*\*\*\*\* CHANNEL f1 \*\*\*\*\*  
 NUC1: 13C  
 P1: 4.00 usec  
 PL1: -5.00 dB  
 SFO1: 75.4752953 MHz

\*\*\*\*\* CHANNEL f2 \*\*\*\*\*  
 CPDPRG2: waltz16  
 NUC2: 1H  
 PCPD2: 100.00 usec  
 PL2: 120.00 dB  
 PL12: 17.00 dB  
 PL13: 17.00 dB  
 SFO2: 300.1312005 MHz

F2 - Processing parameters  
 SI: 32768  
 SF: 75.4677852 MHz  
 WDW: EM  
 SSB: 0  
 LB: 0.50 Hz  
 GB: 0  
 PC: 1.40

1D NMR plot parameters  
 CX: 20.00 cm  
 CY: 50.00 cm  
 F1P: 161.360 ppm  
 F1: 12177.48 Hz  
 F2P: 116.615 ppm  
 F2: 8800.69 Hz  
 PPMCM: 2.23724 ppm/cm  
 HZCM: 168.83934 Hz/cm

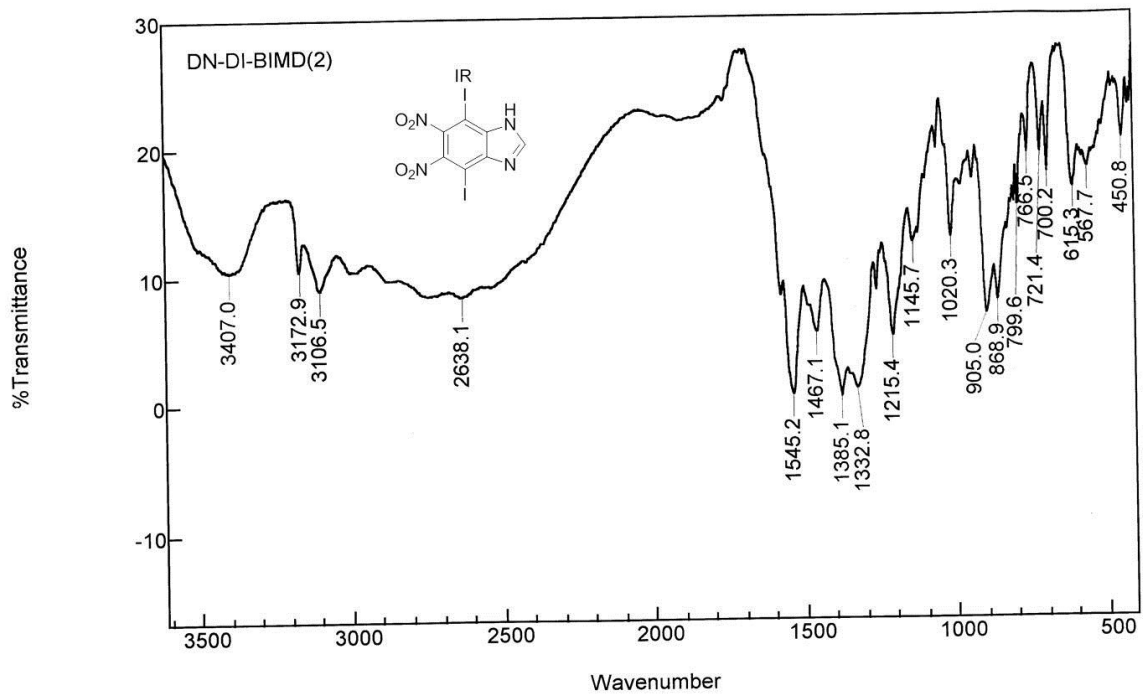



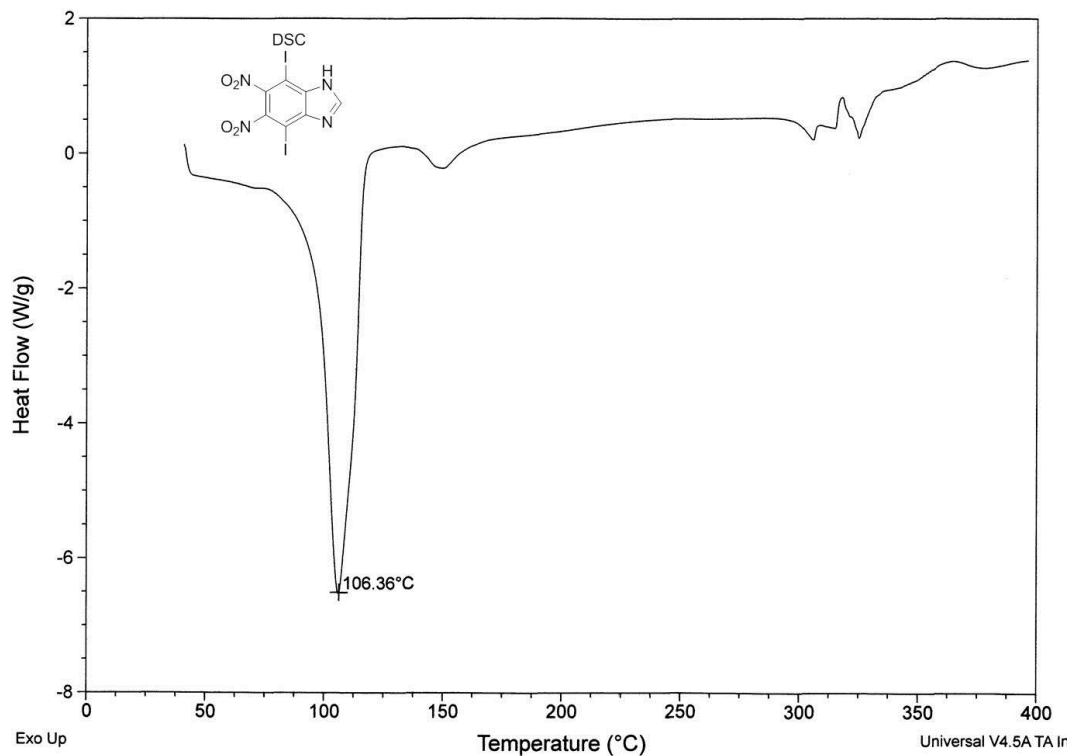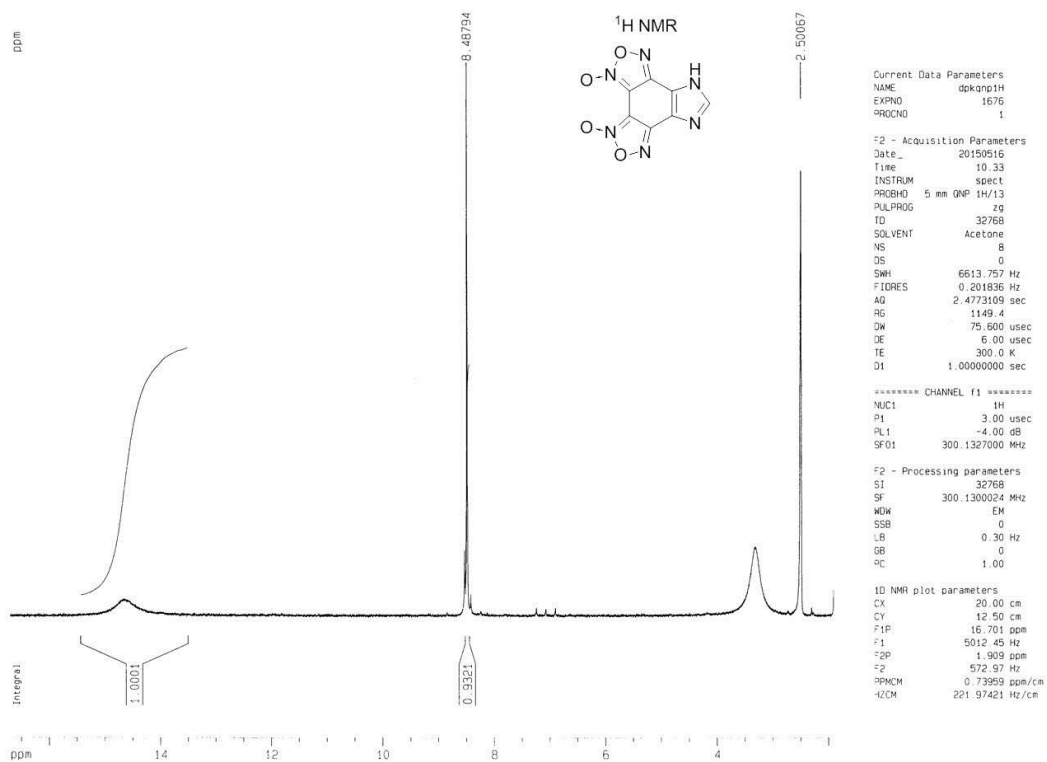

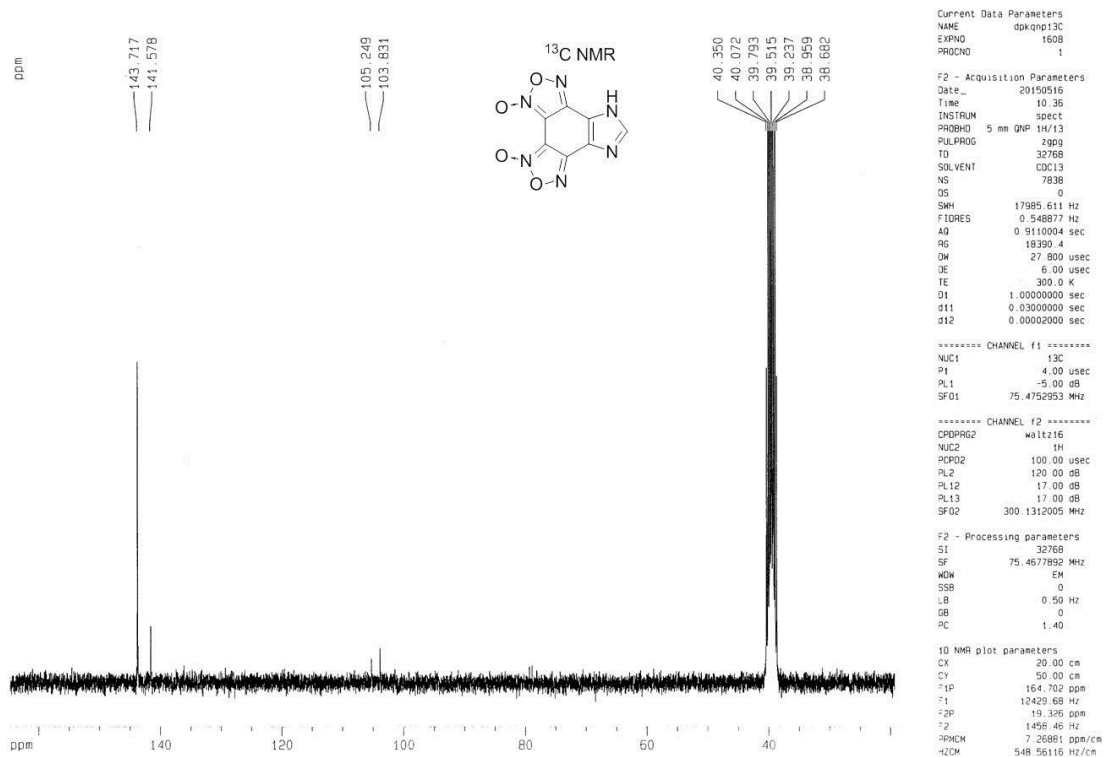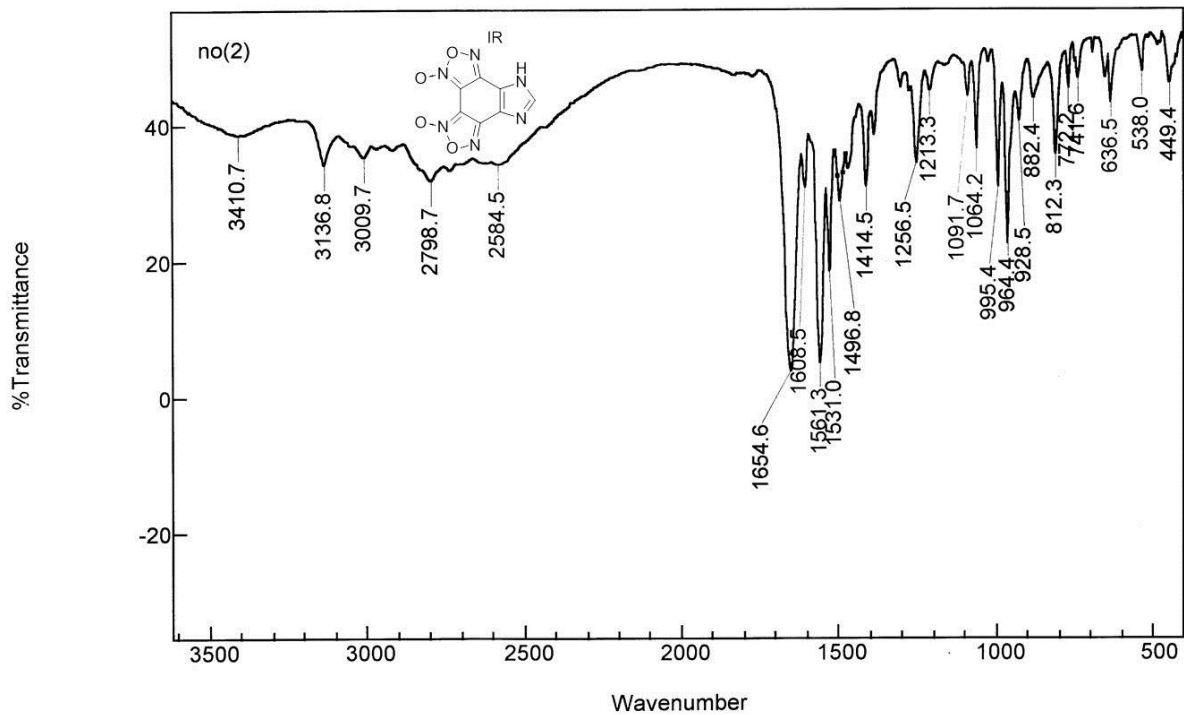

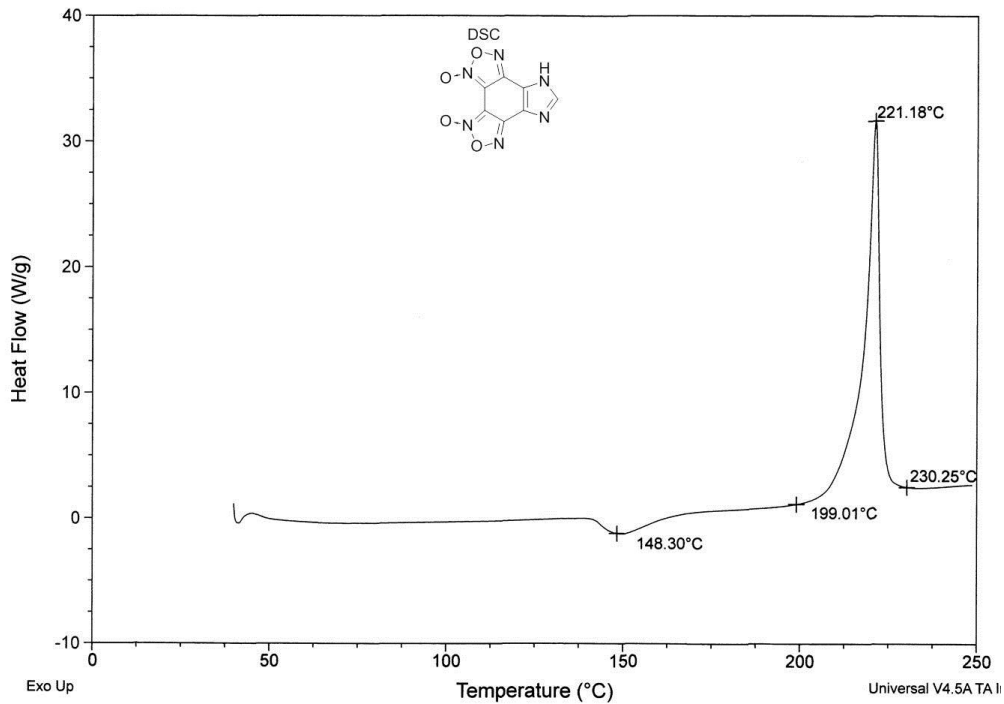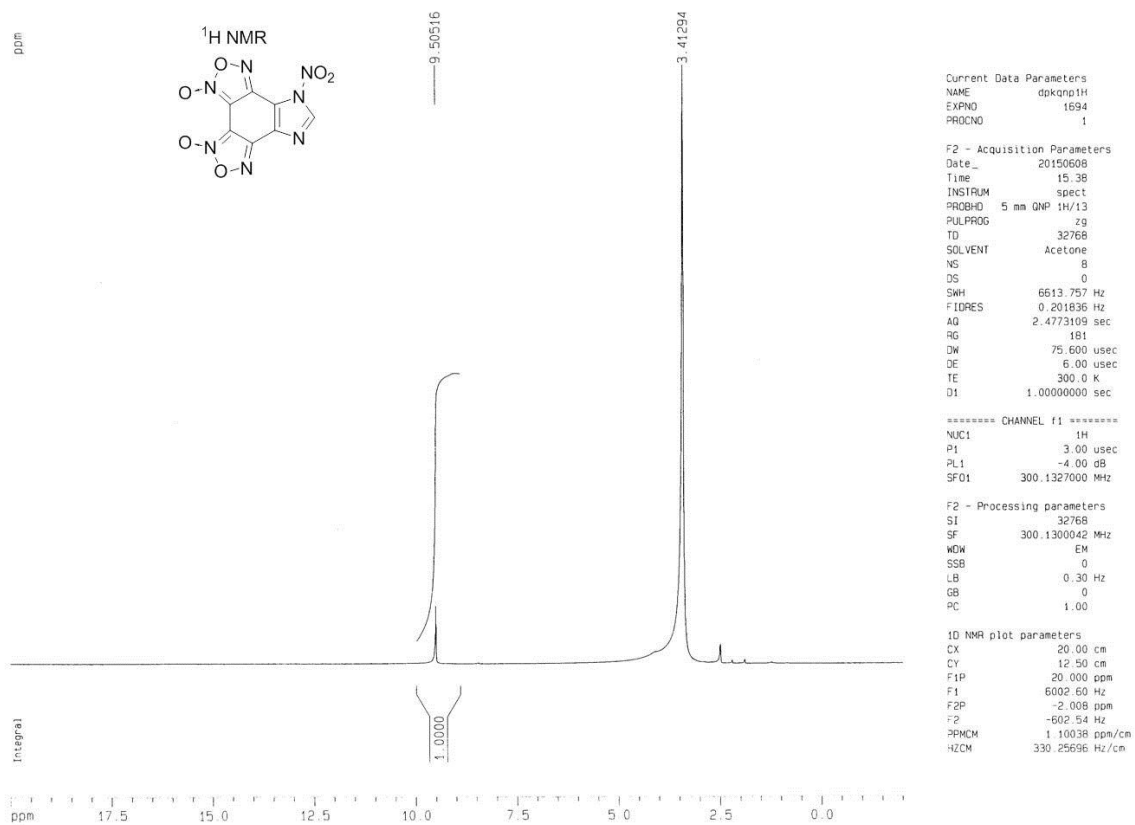

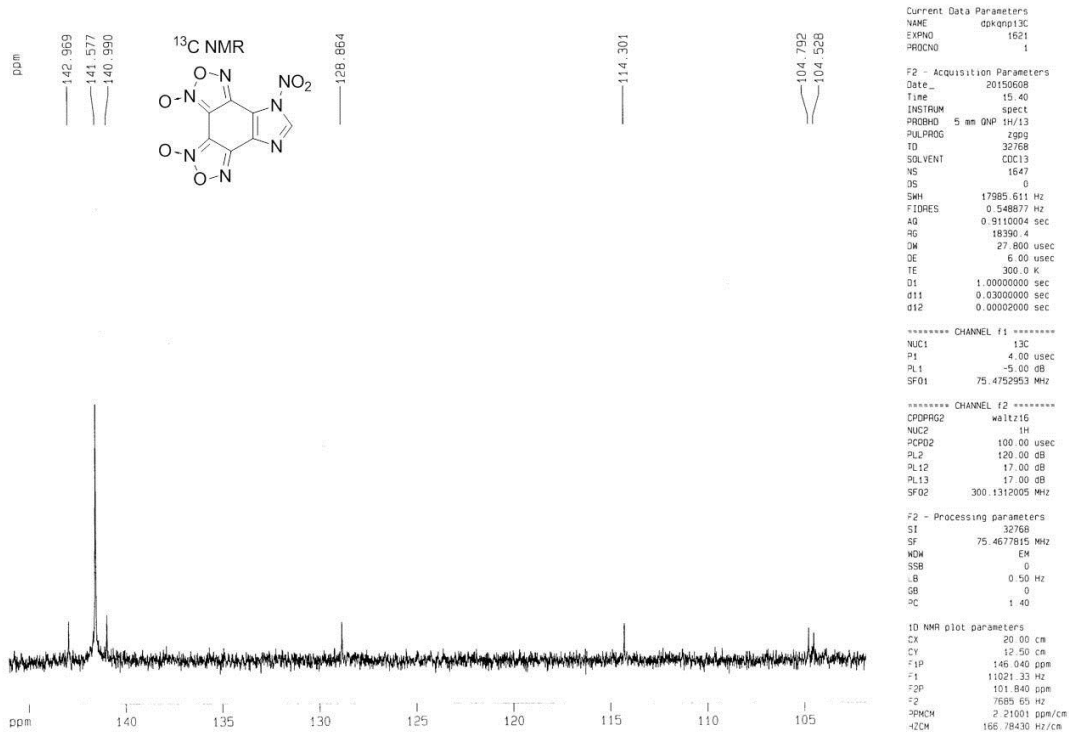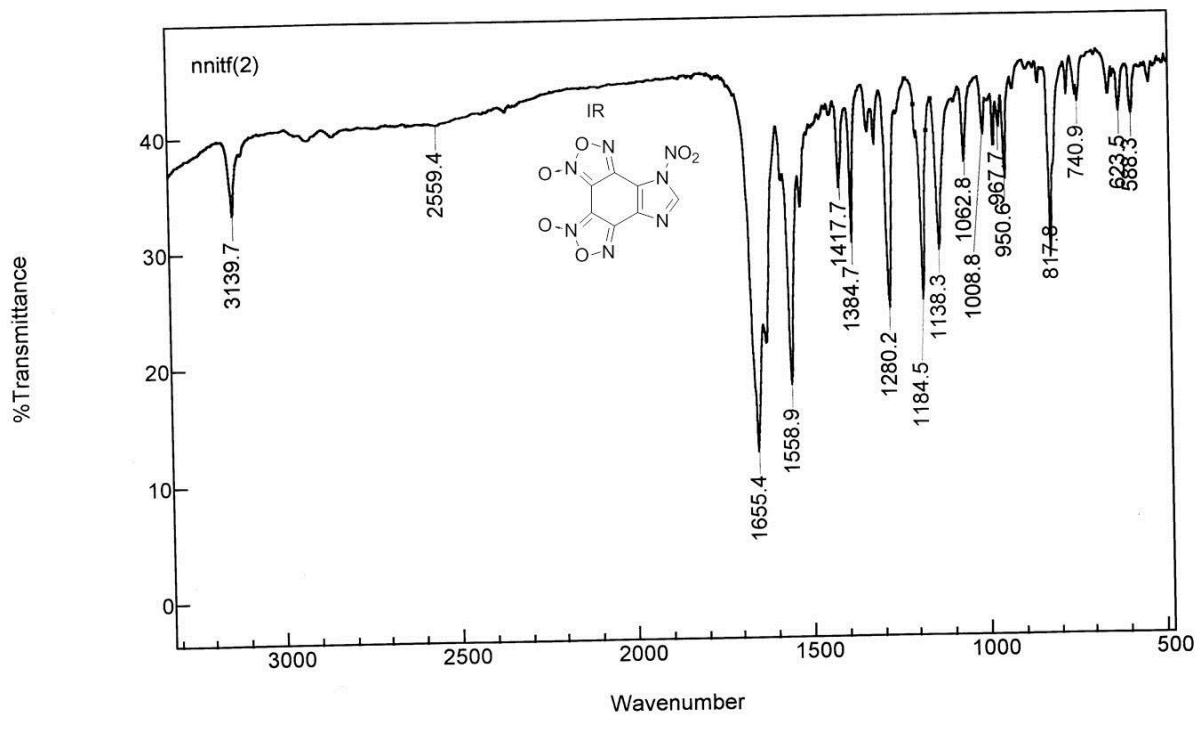

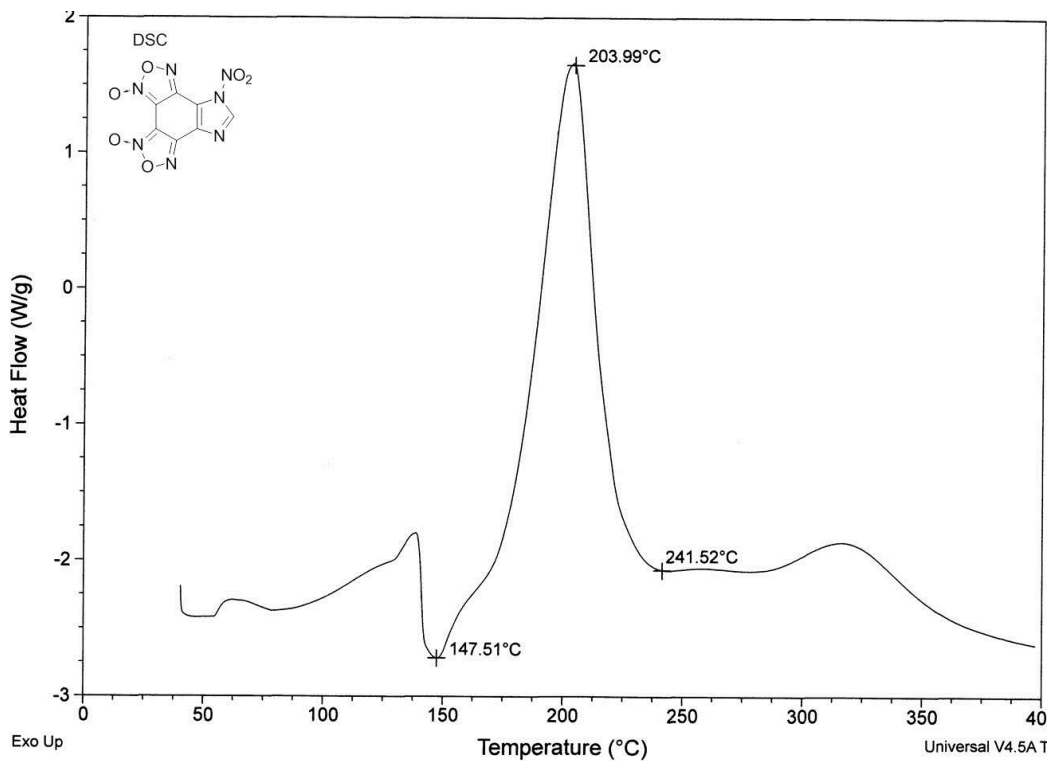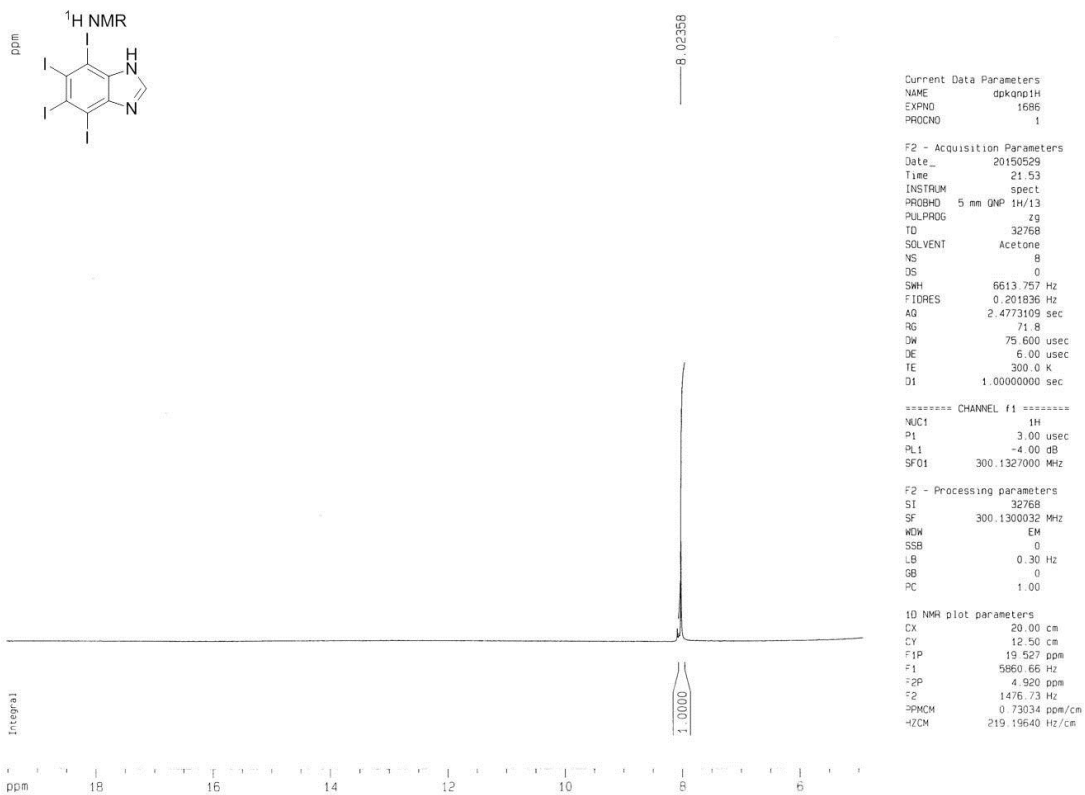

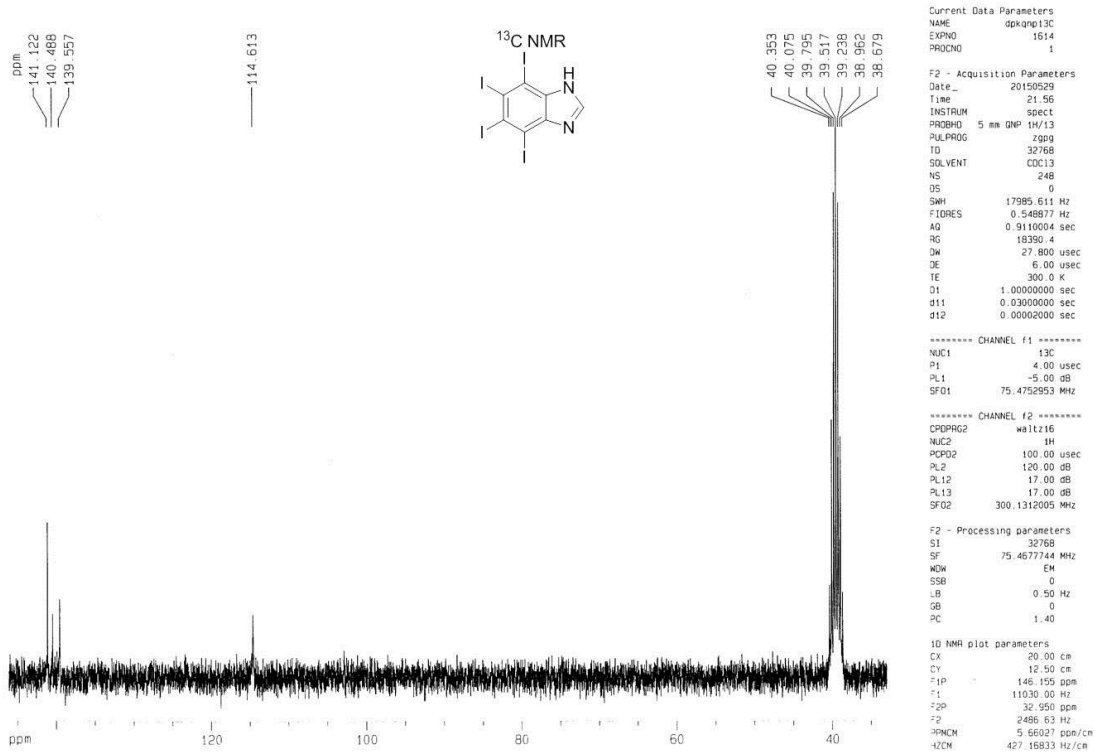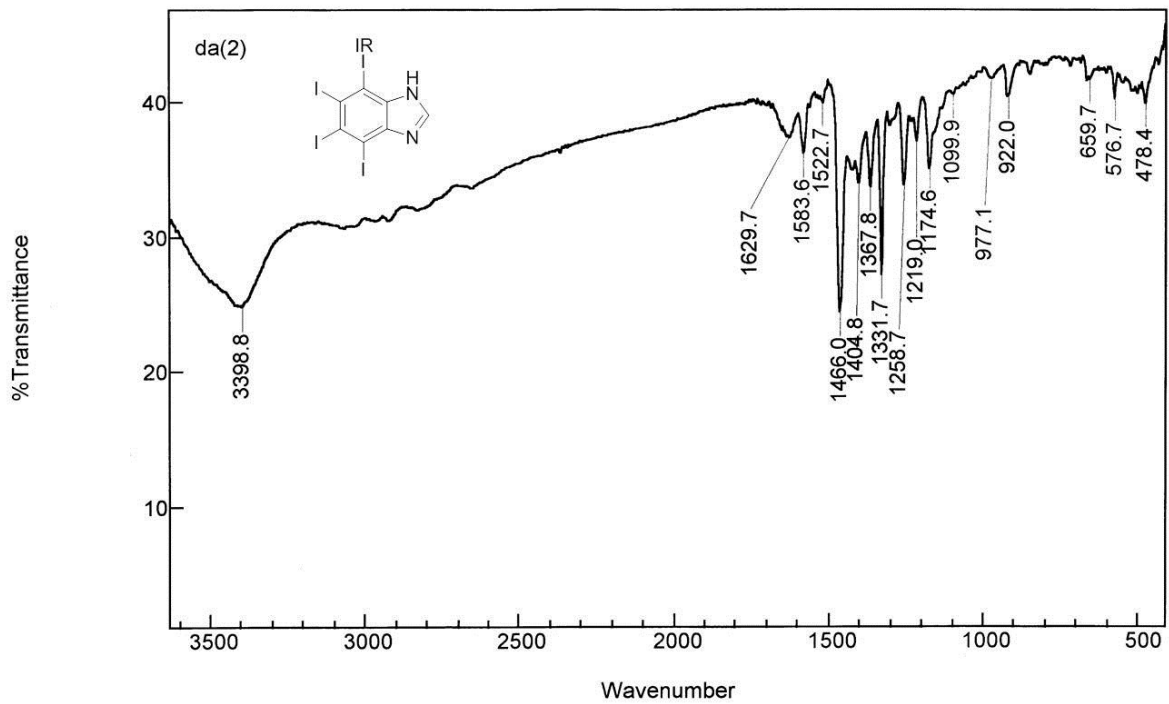

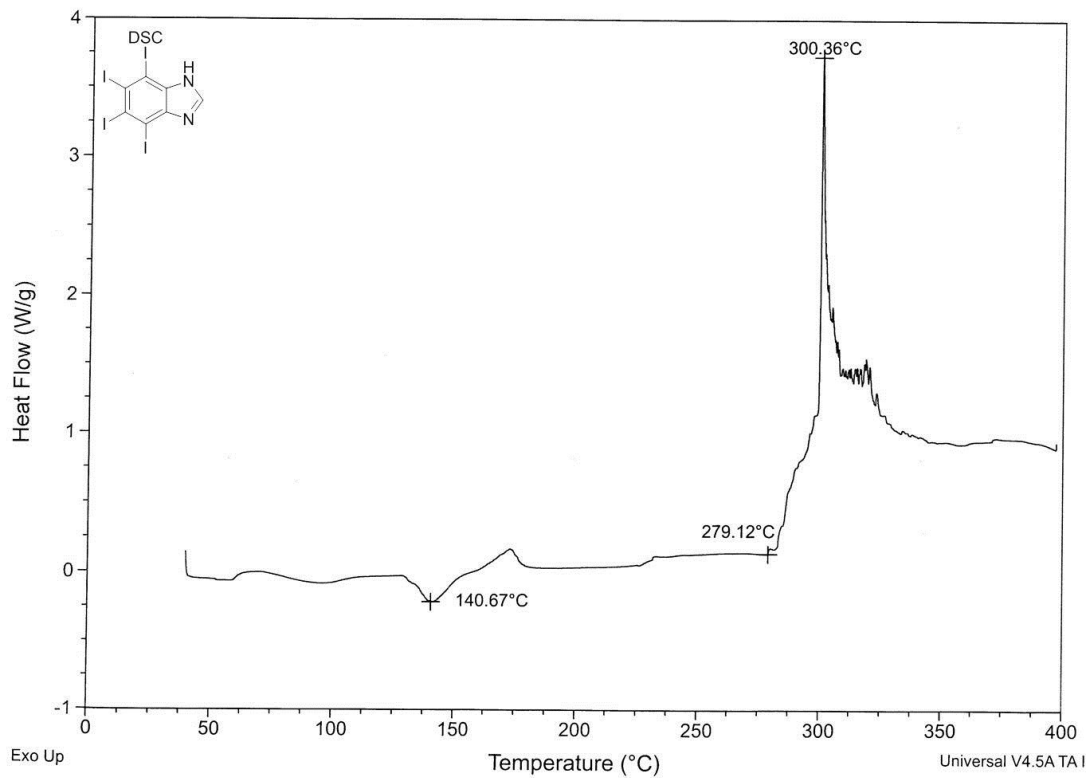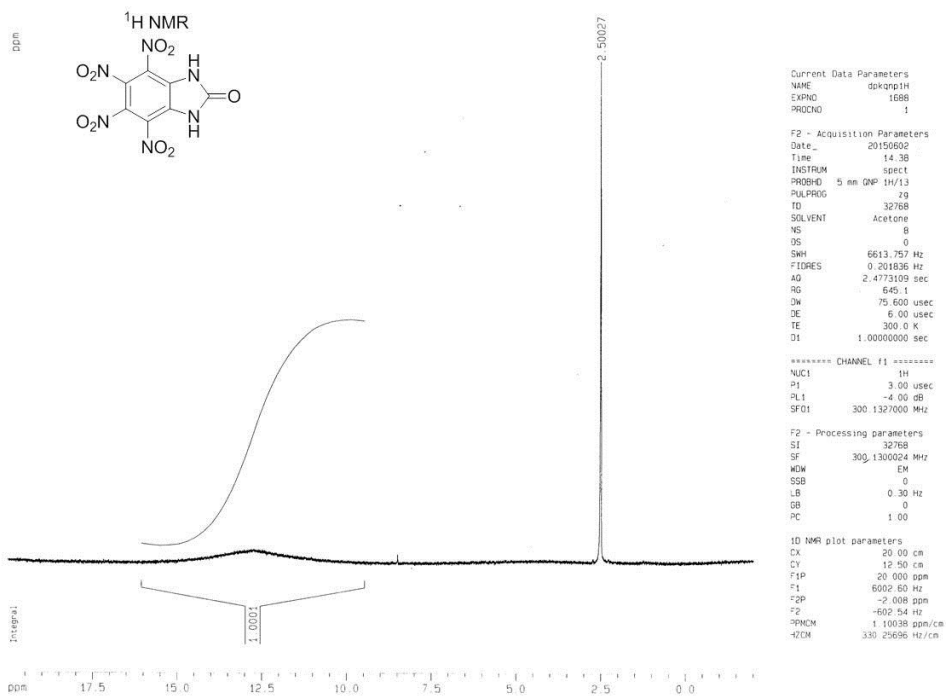

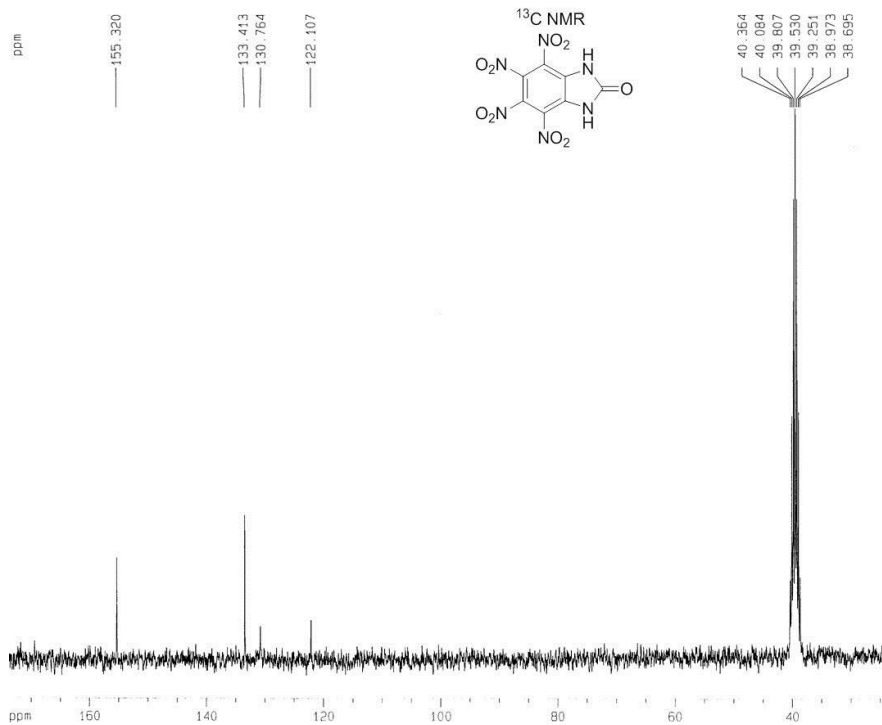

Current Data Parameters  
 NAME dpxqnp13C  
 EXPNO 1616  
 PROCNO 1

F2 - Acquisition Parameters  
 Date\_ 20150602  
 Time 14.41  
 INSTRUM spect  
 PROBHD 5 mm QNP 1H/13  
 PULPROG zgpg30  
 ID 32768  
 SOLVENT CDCl3  
 NS 197  
 DS 0  
 SWH 17985.611 Hz  
 FIDRES 0.546877 Hz  
 AQ 0.9110004 sec  
 RG 18390.4  
 DW 27.800 usec  
 DE 6.00 usec  
 TE 300.0 K  
 D1 1.0000000 sec  
 d11 0.0300000 sec  
 d12 0.0000200 sec

----- CHANNEL f1 -----  
 NUC1 13C  
 P1 4.00 usec  
 PL1 -5.00 dB  
 SFO1 75.4752953 MHz

----- CHANNEL f2 -----  
 CROPRG2 waltz16  
 NUC2 1H  
 PCPD2 100.00 usec  
 PL2 120.00 dB  
 PL12 17.00 dB  
 PL13 17.00 dB  
 SFO2 300.1312005 MHz

F2 - Processing parameters  
 S1 32768  
 SF 75.4677859 MHz  
 MDW EM  
 SSB 0  
 LB 3.00 Hz  
 GB 0  
 PC 1.40

1D NMR plot parameters  
 CX 20.00 cm  
 C1 12.50 cm  
 F1 173.791 ppm  
 F1 13115.62 Hz  
 F2 24.005 ppm  
 F2 1811.69 Hz  
 GPCMC 7.48924 ppm/cm  
 HZCM 565.19678 Hz/cm

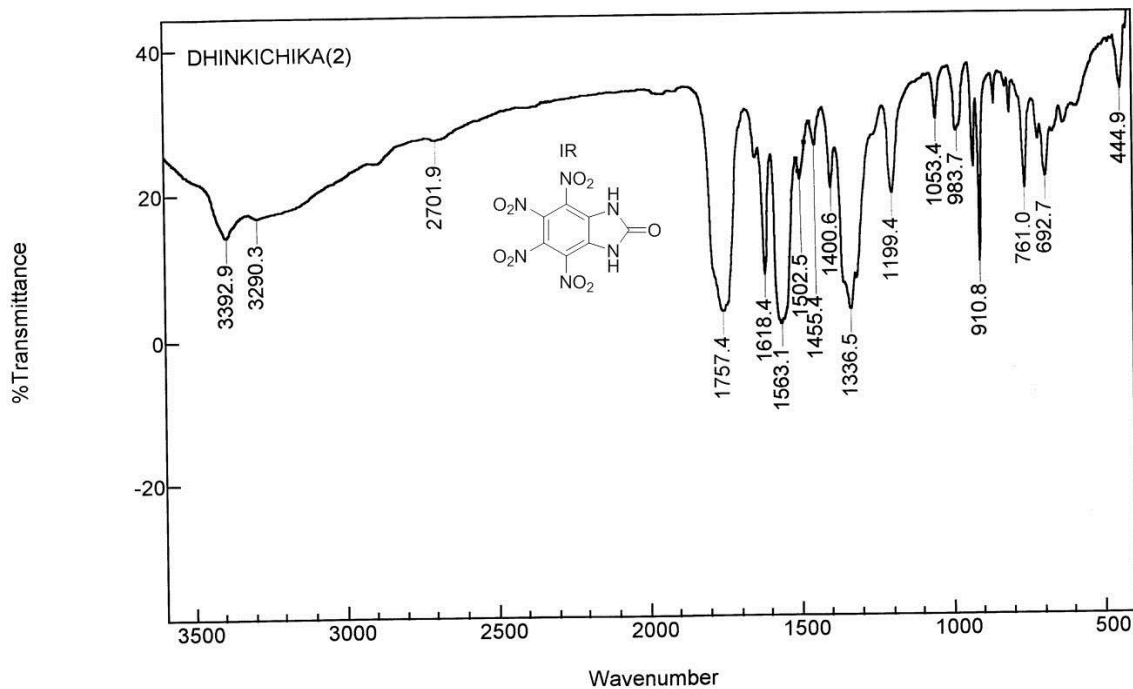



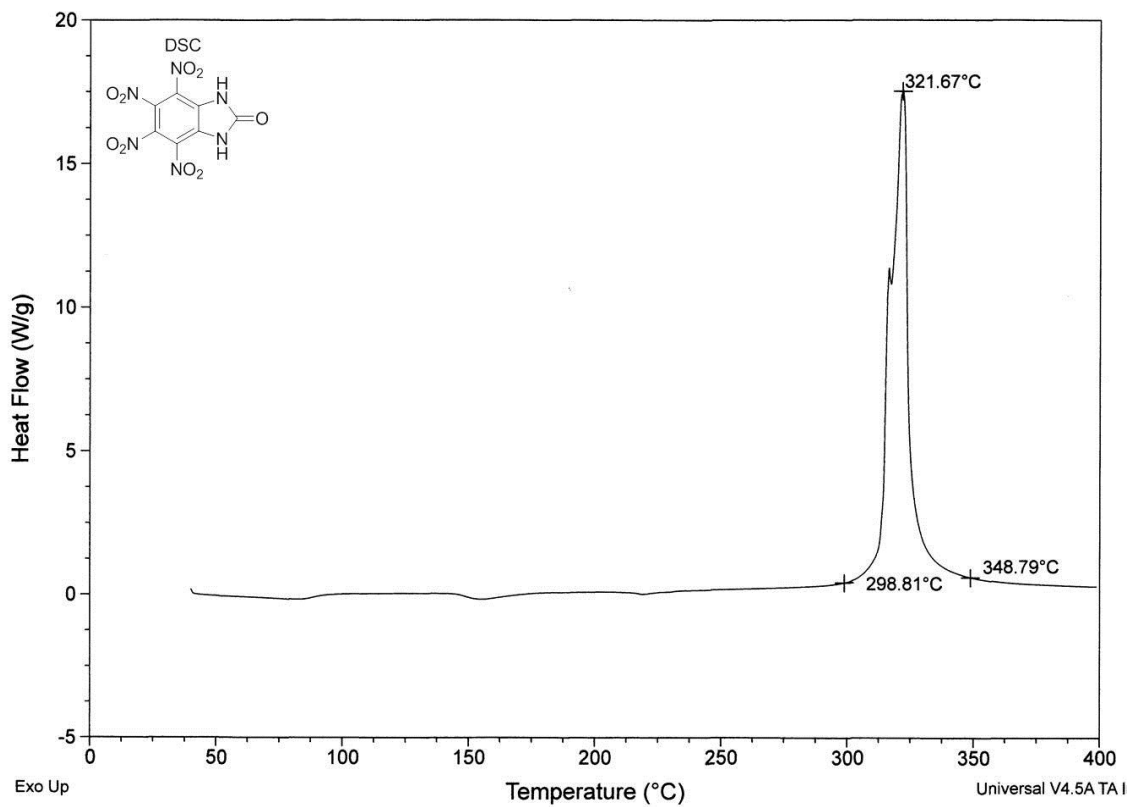

Supplement: c6dt02438f1.pdf [file c6dt02438f1.pdf]
